32 Running title

33 Advancing gene studies in *Malassezia*

34

35 Key words

36 *Malassezia furfur*; insertional mutagenesis; CRISPR/Cas9; protein phosphatase 2A;

37 pleiotropic drug resistance

38

39

40

41

42

43

44

45

46

47

48

49

50

51

52

53

54

55

56

57

58

59 \*Address correspondence to Joseph Heitman, Department of Molecular Genetics and

60 Microbiology, Duke University Medical Center, Durham, North Carolina, United

61 States of America. Phone +1 (919) 684-2824. Fax (919) 684-2790. Email

62 heitm001@duke.edu.

63 **Abstract**

64 *Malassezia* encompasses a monophyletic group of basidiomycetous yeasts  
65 naturally found on the skin of humans and other animals. *Malassezia* species have lost  
66 genes for lipid biosynthesis, and are therefore lipid-dependent and difficult to manipulate  
67 under laboratory conditions. In this study we applied a recently-developed  
68 *Agrobacterium tumefaciens*-mediated transformation protocol to perform T-DNA random  
69 insertional mutagenesis in *Malassezia furfur*. A total of 767 transformants were screened  
70 after exposure to 10 different stresses, and the 19 mutants that exhibited a phenotype  
71 different from the wild type were further characterized. The majority of these strains had  
72 single T-DNA insertions, which were identified within the open reading frames of genes,  
73 within untranslated regions, and in intergenic regions. Some T-DNA insertions generated  
74 chromosomal rearrangements, and others could not be characterized. To validate the  
75 findings of the forward genetic screen, a novel CRISPR/Cas9 system was developed to  
76 generate targeted deletion mutants for 2 genes identified in the screen: *CDC55* and  
77 *PDR10*. This system is based on co-transformation of *M. furfur* mediated by *A.*  
78 *tumefaciens* to deliver both a *CAS9*-gRNA construct that induces double-strand DNA  
79 breaks, and a gene replacement allele that serves as a homology directed repair template.  
80 Targeted deletion mutants for both *CDC55* and *PDR10* were readily generated with this  
81 method. This study demonstrates the feasibility and reliability of *A. tumefaciens*-mediated  
82 transformation to aid in the identification of gene functions in *M. furfur* through both  
83 insertional mutagenesis and CRISPR/Cas9-mediated targeted gene deletion.

84

## 85 **Introduction**

86           The genus *Malassezia* is a lipophilic, monophyletic group of basidiomycetous  
87 yeasts that colonize sebaceous skin sites and represents more than 90% of the skin  
88 mycobiome (FINDLEY *et al.* 2013; WU *et al.* 2015; BYRD *et al.* 2018). In addition to a  
89 ubiquitous presence on the skin of human and animals, recent data support the hypothesis  
90 that *Malassezia* fungi are much more widespread than previously thought. Metagenomics  
91 studies revealed the presence of *Malassezia* DNA in a number of unexpected areas such  
92 as in association with corals and sea sponges in the ocean, although *Malassezia* marine  
93 species have yet to be isolated in axenic culture (AMEND *et al.* 2019). There are currently  
94 18 species within the *Malassezia* genus. One defining characteristic of the *Malassezia*  
95 genus is the lack of a fatty acid synthase,  $\Delta^9$  desaturase, and  $\Delta^{2,3}$  enoyl CoA isomerase,  
96 making them lipid-dependent and difficult to study and manipulate under laboratory  
97 conditions. *Malassezia* are highly divergent from other fungi that are commonly found on  
98 the skin, such as *Candida* species and the dermatophytes. Furthermore, *Malassezia*  
99 species belong to the Ustilaginomycotina subphylum, which includes the plant pathogens  
100 *Ustilago*, *Sporisorium*, and *Tilletia*, and are highly divergent from other basidiomycetous  
101 fungi that infect humans, such as *Cryptococcus neoformans*. Recent classifications  
102 revealed that *Malassezia* represents a sister group to the blast yeast-like fungi *Moniliella*  
103 (WANG *et al.* 2014; WANG *et al.* 2015), which includes species reported to be pathogenic  
104 on human and animal skin (MCKENZIE *et al.* 1984; PAWAR *et al.* 2002) as well as others  
105 that are of interest in sugar alcohol production in industrial settings (KOBAYASHI *et al.*  
106 2015).



107           In the last decade, there has been increasing scientific interest in *Malassezia*, with  
108 several sequencing projects aimed at defining genomic features and gene content for 15  
109 broadly recognized *Malassezia* species (XU *et al.* 2007; GIOTI *et al.* 2013; TRIANA *et al.*  
110 2015; WU *et al.* 2015; PARK *et al.* 2017; ZHU *et al.* 2017; KIM *et al.* 2018; LORCH *et al.*  
111 2018; CHO *et al.* 2019; MORAND *et al.* 2019). All haploid *Malassezia* species have small  
112 genomes compared to other phylogenetically related fungi (7 to 9 Mb compared to ~20  
113 Mb), and have lost genes involved in carbohydrate metabolic processes and hydrolysis  
114 activity. Genome analyses have revealed intriguing features, such as i) loss of the RNA  
115 interference pathway components; ii) evidence of horizontal gene transfer events from  
116 bacteria; iii) the presence of genes unique to *Malassezia*; and iv) the expansion of  
117 secreted protein, lipase, and protease gene families that encode products predicted to  
118 breakdown lipids and proteins important for growth and host and microbial interactions.

119           The typical *Malassezia* genome is between ~7 and 9 Mb, which is about half the  
120 size of other basidiomycetous fungi, with the exception of *M. furfur* hybrid species whose  
121 genomes are twice the size of other *Malassezia* species. It is likely that the genomes of  
122 *Malassezia* species have reduced over time concomitantly with their evolution as a  
123 commensal organism and adaptation to the skin (WU *et al.* 2015). There are other cases in  
124 which fungal genome reduction correlates with niche specialization, with the most  
125 remarkable examples being the obligate *Pneumocystis* species with genomes of ~7-8 Mb  
126 (MA *et al.* 2016), and *Microsporidia* species with genomes as small as 2.9 Mb (CUOMO *et*  
127 *al.* 2012).

128           Aside from their commensal lifestyle, *Malassezia* fungi have been associated with  
129 several skin disorders, including pityriasis versicolor, dandruff, severe atopic dermatitis

130 in humans, and otitis in dogs (GAITANIS *et al.* 2012; WU *et al.* 2015). However, the exact  
131 role of *Malassezia* in these clinical conditions has been controversial, with recent studies  
132 even hypothesizing a protective role of *M. globosa* against *Staphylococcus aureus*, a  
133 bacterium that is associated with severe atopic dermatitis (LI *et al.* 2017; IANIRI *et al.*  
134 2018). The lack of knowledge regarding *Malassezia* function within the skin mycobiome  
135 is due, in part, to the dearth of experimental systems for studying *Malassezia*-host  
136 interactions; current knowledge is based solely on in vitro experiments with isolated host  
137 cells (WATANABE *et al.* 2001; ISHIBASHI *et al.* 2006; DONNARUMMA *et al.* 2014; GLATZ  
138 *et al.* 2015; SPARBER AND LEIBUNDGUT-LANDMANN 2017). Recently, 2 groundbreaking  
139 studies reported novel experimental murine models for studying *Malassezia* interactions  
140 with the skin and intestinal mucosa (LIMON *et al.* 2019; SPARBER *et al.* 2019). Sparber  
141 and colleagues demonstrated that the application of *M. sympodialis*, *M. pachydermatis*,  
142 and *M. furfur* on the dorsal ear skin of mice resulted in robust colonization of the  
143 epidermis and a rapid cytokine response dominated by IL-17 and related factors. This  
144 response was found to be critical for preventing fungal overgrowth on *Malassezia*-  
145 exposed skin and exacerbates inflammation under atopy-like conditions (SPARBER *et al.*  
146 2019). Another study by Limon and colleagues demonstrated the involvement of  
147 *Malassezia* in inflammatory bowel disease. The authors characterized the mycobiome  
148 associated with the intestinal mucosa of healthy individuals and patients with Crohn's  
149 disease, and found that *M. restricta*, one of the most common inhabitants of human skin,  
150 was especially abundant in Crohn's disease patients. Moreover, the presence of *M.*  
151 *restricta* was linked with a polymorphism in the gene for CARD9, a signaling adaptor

152 critical for defense against fungi (LIMON *et al.* 2019). The importance of these studies has  
153 been highlighted in 2 commentaries (DAWSON 2019; WRIGHTON 2019).

154 Although these models represent an important advance in understanding the  
155 mechanisms of host responses to *Malassezia*, a lack of technologies for functional genetic  
156 studies has hampered the identification and characterization of the fungal components  
157 that promote inflammation and induce host responses. We were the first group to develop  
158 a transformation system based on transconjugation-mediated by *Agrobacterium*  
159 *tumefaciens* (AtMT, *A. tumefaciens*-mediated transformation) that is effective for both  
160 insertional and targeted mutagenesis and enabled the first genetic manipulation of *M.*  
161 *furfur* and *M. sympodialis* (IANIRI *et al.* 2016; IANIRI *et al.* 2017). Subsequently, *M.*  
162 *pachydermatis* has also been transformed (CELIS *et al.* 2017).

163 CRISPR (clustered regularly interspaced short palindromic repeats)/Cas9 was  
164 originally discovered as a mechanism of adaptive bacterial immunity for defense against  
165 invading DNA elements (JINEK *et al.* 2012). The CRISPR/Cas9 system has been  
166 modified for use in other organisms, and at present, represents a revolutionary technology  
167 that has allowed gene editing in a number of cell types, including fungi (SHI *et al.* 2017;  
168 ADLI 2018). The system consists of 2 elements: a specific endonuclease (Cas9) and a  
169 guide RNA (gRNA) that form a complex that catalyzes double-strand breaks (DSBs) at a  
170 specific DNA site flanking a protospacer adjacent motif (PAM) sequence of the host  
171 genome. After the DSB is generated, the DNA can be repaired either through non-  
172 homologous end joining (NHEJ) or through homology directed repair (HDR) when donor  
173 DNA is provided (SHI *et al.* 2017).

174           The present study is divided into 2 sections. In the first, we build upon the  
175 previously developed AtMT technology to perform the first T-DNA-mediated genetic  
176 screen in *M. furfur*. The aim was to generate a library of random insertional mutants,  
177 select for mutants with a phenotype of interest, and characterize insertion sites within the  
178 *M. furfur* genome to infer the function of genes involved in processes of physiological  
179 and clinical interest. In the second part of this study, we developed the first efficient,  
180 transient CRISPR/Cas9 mutagenesis system for *Malassezia*, and successfully generated  
181 targeted deletion mutants of two genes identified in the forward screen: *CDC55*, which  
182 encodes a subunit of protein phosphatase 2A (PP2A), and *PDR10*, which encodes an  
183 ABC transporter predicted to be involved in pleiotropic drug resistance. When validating  
184 the effectiveness of the T-DNA insertional mutagenesis for gene function studies, this  
185 novel CRISPR/Cas9 technology overcomes issues related to the reduced rate of  
186 homologous recombination observed in *M. furfur*, and we expect that it will facilitate  
187 molecular research on *Malassezia* fungi.

188

189

190

191

192

193

194

195

196

197

198

199

## 200 **Materials and Methods**

201 **Strains and culture conditions.** The haploid *M. furfur* strain CBS14141 (previously

202 known as JPLK23) was used as the wild type (WT) strain for transformation experiments.

203 This strain was maintained on modified Dixon's media (mDixon) [mycological peptone

204 (10 g/L), malt extract (36 g/L), glycerol (2 ml/L), tween 60 (10 ml/L), desiccated ox-bile

205 (10 g/L) and agar (20g/L) for solid media]. Transformants were maintained on mDixon

206 supplemented with the antifungal agents nourseothricin (NAT) or G418 (NEO).

207

208 **Forward genetics screen in *M. furfur*.** Insertional mutagenesis was performed through

209 AtMT using *Agrobacterium tumefaciens* strain EHA105 engineered with the binary

210 vectors pAIM2 or pAIM6, which contain *NAT* and *NEO* resistance markers under the

211 control of *M. sympodialis* *ACT1* promoter and terminator, respectively (IANIRI *et al.*

212 2016). Initially, transformations were performed using previously developed methods

213 (IANIRI *et al.* 2016; CELIS *et al.* 2017). Selected transformants were colony-purified on

214 selective media and arrayed in 96 well plates containing 100  $\mu$ L of mDixon + NAT or

215 mDixon + NEO for in vitro assays and long-term storage.

216 For the primary screen, a 1.5  $\mu$ L aliquot of cellular suspension of transformants

217 was spotted on mDixon agar containing the following chemicals: Congo red (0.5%),

218 sodium chloride (NaCl, 1M), sodium dodecyl sulfate (SDS, 0.3%), or fluconazole (FLC,

219 150  $\mu$ g/ml) for cell wall and plasma membrane stress; NaNO<sub>2</sub> (100 mM) for nitrosative

220 stress; or CdSO<sub>4</sub> (30 μM) for protein-folding defects and heavy metal stress.  
221 Transformants were also exposed to UV light (250 to 450 μJ x 100), elevated temperature  
222 (37°C), pH (pH 7.5), and nutrient-limiting conditions [yeast nitrogen base media (YNB)];  
223 when used, arginine and tyrosine were added at 30 mg/L. Transformants selected in the  
224 primary screen as having a phenotype different than the WT were confirmed through a  
225 standard 1:10 serial dilution method by spotting 1.5 μL of cellular suspension on mDixon  
226 agar in the conditions that allowed their selection.

227

### 228 **Molecular characterization of the T-DNA insertional mutants of *M. furfur*.**

229 Insertional mutants with a phenotype of interest were single-colony purified and grown  
230 overnight in 25 mL of liquid mDixon for genomic DNA extraction using a CTAB  
231 extraction buffer (PITKIN *et al.* 1996). To identify the insertion sites of the T-DNA in the  
232 *M. furfur* genome, inverse PCR (iPCR) was performed according to previously published  
233 methods (IDNURM *et al.* 2004; IANIRI AND IDNURM 2015). Briefly, approximately 2 μg of  
234 DNA were digested with the restriction enzymes PvuII, XhoI, SacII, ApaI, EcoRI (6-bp  
235 recognition site) or TaqI (4-bp recognition site), column purified, and eluted in 30 μL of  
236 elution buffer. Then, 8.5 μL of digested DNA were self-ligated with T4 DNA ligase  
237 (New England Biolabs) overnight at 4°C, and 1 μL was used as template for iPCR using  
238 primers ai76-ai77 for DNA digested with restriction enzymes that cut outside the T-DNA  
239 region, or ai076-M13F and ai077-M13R where restriction enzymes that cut inside the T-  
240 DNA were used (IDNURM *et al.* 2004). iPCR conditions were: initial denaturation at 94°C  
241 for 2 min, denaturation at 94°C for 30 sec, annealing at 55°C for 30 sec, and extension at  
242 72°C for 2.5 min. PCR reactions were performed using ExTaq polymerase (Taqara Bio,

243 Japan) according to manufacturer's instructions. When ExTaq PCRs were unsuccessful,  
244 LaTaq polymerase (Taqara Bio, Japan) suitable for high G+C rich regions was used with  
245 an annealing temperature of 55°C and 60°C. Amplicons were either PCR- or gel-purified  
246 and subjected to Sanger sequencing. Sequences were subjected to BLASTn analysis  
247 against the *M. furfur* CBS 14141 genome assembly available on NCBI (reported as  
248 JPLK23) (WU *et al.* 2015) and against an unpublished PacBio assembly. Gene  
249 boundaries and regulatory regions were determined using unpublished RNAseq data,  
250 which allowed us to define the accurate locations of T-DNA insertions. Retrieved *M.*  
251 *furfur* sequences were subjected first to BLASTx analysis against the latest genome  
252 assembly of *M. sympodialis* (ZHU *et al.* 2017) and subsequently on SGD (Saccharomyces  
253 Genome Database) to identify orthologs and infer gene function. Genes were named  
254 based on orthologous genes in *Saccharomyces cerevisiae*. Gene annotation was carried  
255 out manually based on BLAST searches and with the automated software Augustus  
256 (<http://bioinf.uni-greifswald.de/augustus/submission.php>) using RNAseq for untranslated  
257 regions (UTRs) and introns.

258 For Southern blot analysis, ~2 µg of genomic DNA were digested with SacII (no  
259 cut sites are within the *NAT* or *NEO* cassette, thus allowing us to determine the number of  
260 T-DNA insertions), resolved on a 0.8% agarose gel in 1x Tris-acetate EDTA (TAE)  
261 buffer, transferred to a Zeta-Probe membrane, and probed with *NAT* or *NEO* cassettes  
262 labeled with [<sup>32</sup>P]dCTP. *NAT* and *NEO* cassettes were amplified from plasmids pAIM2  
263 and pAIM6, respectively, with universal M13F and M13R primers.

264 RNA extraction was performed using the standard TRIzol method (RIO *et al.*  
265 2010). RNA was treated with the TURBO DNase enzyme (Thermo Fisher Scientific)

266 according to the manufacturer's instructions, and quality was assessed using a NanoDrop  
267 spectrophotometer. Then, 3  $\mu$ g of purified RNA were converted into cDNA via the  
268 Affinity Script QPCR cDNA synthesis kit (Agilent Technologies) according to  
269 manufacturer's instructions. For each sample, cDNA synthesized without the RT/RNase  
270 block enzyme mixture was used as a control for genomic DNA contamination.  
271 Approximately 500 pg of cDNA were used to measure the relative expression level of  
272 target genes through quantitative real-time PCR (RT-qPCR) using the Brilliant III ultra-  
273 fast SYBR green QPCR mix (Agilent Technologies) in an Applied Biosystems 7500  
274 Real-Time PCR System. For each target, a "no-template control" was performed to  
275 analyze melting curves and to exclude primer artifacts. Technical triplicates and  
276 biological triplicates were performed for each sample. Gene expression levels were  
277 normalized using the endogenous reference gene *TUB2* and determined using the  
278 comparative  $\Delta\Delta$ Ct method.

279

### 280 **Generation of plasmid for CRISPR/Cas9 targeted mutagenesis in *M. furfur***

281 Plasmids for targeted mutagenesis of *M. furfur* *CDC55* and *PDR10* through *A.*  
282 *tumefaciens*-mediated transformation were assembled in *S. cerevisiae* using the binary  
283 vector pGI3 as previously reported (IANIRI *et al.* 2016; IANIRI *et al.* 2017). The *NAT*  
284 cassette was amplified from plasmid pAIM1 using primers JOHE43277 and JOHE43278.  
285 The 5' and 3' flanking regions for homologous recombination were amplified from the  
286 genomic DNA of *M. furfur* CBS14141 using primer pairs JOHE45209-JOHE45210 and  
287 JOHE45211-JOHE45212 for *CDC55* and JOHE45201-JOHE45212 and JOHE45203-  
288 JOHE45204 for *PDR10*, respectively. The PCR products and the double-digested (KpnI



289 and BamHI) binary vector pGI3 were transformed into *S. cerevisiae* using lithium acetate  
290 and PEG 3750 as previously reported (IANIRI *et al.* 2016). To assess correct  
291 recombination of the newly generated plasmids, single colonies of *S. cerevisiae*  
292 transformants were screened by PCR using primers specific for the *NAT* marker  
293 (JOHE43281–JOHE43282) in combination with primers homologous to outside of the  
294 region of the plasmid pGI3 involved in the recombination event (JOHE43279-  
295 JOHE43280). Positive clones of *S. cerevisiae* were grown ON in YPD and subjected to  
296 phenol-chloroform-isoamyl alcohol (25:24:1) plasmid extraction using a previously  
297 reported protocol (HOFFMAN 2001). The plasmid DNA obtained was then introduced into  
298 the *A. tumefaciens* EHA105 strain by electroporation, and the transformants were  
299 selected on LB + 50 µg/mL kanamycin. PCRs were performed using ExTaq and/or  
300 LATAq polymerase as described previously, with the only difference being an extension  
301 time of 1.5 min.

302 To generate the components of the CRISPR/Cas9 system in *Malassezia*, the  
303 histone H3 was identified in the *M. sympodialis* ATCC42132 genome assembly (ZHU *et*  
304 *al.* 2017) through BLASTp analysis using *S. cerevisiae* H3 as query. The 813-bp  
305 upstream and 257-bp downstream regions, including the *M. sympodialis* H3 promoter and  
306 terminator (indicated as *pH3*, and *tH3*), respectively, were amplified by PCR using  
307 JOHE46457-JOHE46458, and JOHE46461-JOHE46462, respectively. High Fidelity  
308 (HF) Phusion Taq polymerase (New England Biolabs) was used according to  
309 manufacturer's instructions, with an annealing temperature of 55°C for 30 sec, and 1 min  
310 extension at 72°C. Primer JOHE46457 includes a chimeric region for recombination in  
311 pPZP-201BK and a multicloning site, and primers JOHE46458 and JOHE46461 include

312 chimeric regions for recombination with primers JOHE46459 and JOHE46460, which  
313 were used to amplify *CAS9* open reading frame (ORF) from plasmid pXL1-Cas9 (FAN  
314 AND LIN 2018). Primer JOHE46462 has SacII and SpeI restriction sites, and a region for  
315 recombination with the promoter of the 5SrRNA of *M. sympodialis* used to drive  
316 expression of the single guide RNA (gRNA). *CAS9* amplification did not work well with  
317 HF Phusion Taq, so we used ExTaq polymerase as described above, but with fewer  
318 cycles (20 cycles) and a 4-min extension. The *M. sympodialis* ATCC 42132 ribosomal  
319 cluster was identified in the latest genome assembly and annotation (ZHU *et al.* 2017)  
320 through BLASTn analysis using ITS sequences from *M. sympodialis* CBS 7222 available  
321 on GenBank (accession number NR\_103583). A 674-bp region from the end of the  
322 rRNA-eukaryotic large subunit ribosomal RNA (position 612351 on chromosome 5),  
323 including the rRNA-5S ribosomal RNA gene (position 613025 on chromosome 5), was  
324 amplified by PCR using primers JOHE46463-JOHE46464. Primer JOHE46463 has a  
325 chimeric region complementary to primer JOHE46462. This PCR was performed using  
326 the touchdown protocol, with an initial denaturation of 94°C per 5 min, followed by 24  
327 cycles of denaturation at 94°C for 30 sec, annealing at a gradient temperature of 62°C for  
328 30 sec minus 1°C per cycle, and extension at 72°C for 1 min. This was followed by 16  
329 cycles of denaturation at 94°C for 30 sec, annealing at 50°C for 30 sec, extension at 72°C  
330 for 1 min, with a final extension of 72°C for 5 min. The gRNA scaffold was amplified  
331 from plasmid pSDMA64 (ARRAS *et al.* 2016) using primers JOHE46465-JOHE46466.  
332 JOHE46466 includes SpeI and SacII restriction sites, 7 thymine residues (6T terminator),  
333 and a chimeric region for recombination in pPZP-201BK.

334 The specific target sequence for *CDC55* was identified using the program  
335 EuPaGDT (<http://grna.ctegd.uga.edu/>) available on FungiDB  
336 (<https://fungidb.org/fungidb/>). Specific target sequence for the gene *CDC55* was added  
337 by PCR with primers JOHE46468-JOHE46466 using the gRNA scaffold as template.  
338 Primer JOHE46468 has a chimeric region for recombination with both the 5SrRNA  
339 sequence and the gRNA scaffold, with an intervening target sequence specific for  
340 *CDC55*. These PCRs were performed using HF Phusion Taq as reported above. All  
341 components were gel purified, and equimolar amounts of the purified amplicons were  
342 used for overlap PCR to generate the Cas9 expression cassette (*pH3-CAS9, tH3*) and the  
343 complete gRNA (5S rRNA promoter fused with the gene-specific gRNA scaffold). PCRs  
344 were carried out using HF Phusion taq and the touch down protocol as above, with the  
345 only difference being extension times of 5 min and 1 min, respectively. The 2 resulting  
346 amplicons were cloned within the T-DNA of pPZP201BK digested with KpnI and  
347 BamHI through HiFi (New England Biolabs) assembly according to manufacturer's  
348 instructions and recovered in *Escherichia coli* DH5 $\alpha$ . *E. coli* clones were screened for  
349 recombinant plasmids by PCR using primers specific for the plasmid backbone  
350 (JOHE43279 and JOHE43280) in combination with JOHE46458 and JOHE46463,  
351 respectively. The plasmid sequence for CRISPR/Cas9 deletion of *CDC55* (named pGI40)  
352 was confirmed by Sanger sequencing.

353 To generate the CRISPR/Cas9 plasmid for targeted mutagenesis of *PDR10*, the  
354 binary vector pGI40 was digested with SpeI to remove the *CDC55*-specific gRNA,  
355 recovered from the gel and purified. A *PDR10*-specific target sequence designed using  
356 EuPaGDT was added to the gRNA scaffold by PCR using primers JOHE46466-

357 JOHE46467, which have chimeric regions for recombination with both the 5SrRNA  
358 sequence and the gRNA scaffold, with the specific target sequence for *PDR10* in  
359 between.

360 This amplicon and the 5SrRNA previously generated were recombined through HiFi  
361 assembly within the T-DNA of the *SpeI*-digested pGI40, and the novel recombinant  
362 plasmids with the *PDR10*-specific gRNA (named pGI48) were identified by Sanger  
363 sequencing. This procedure is reported in Figure 4B. Recombinant plasmids were  
364 introduced in *A. tumefaciens* through electroporation.

365 AtMT was performed with modifications that increase transformation efficiency  
366 compared to our previous protocol used to generate insertional mutants. Briefly, *M. furfur*  
367 was grown for 2 days at 30°C and the culture was diluted to OD<sub>600</sub> ~1. The engineered *A.*  
368 *tumefaciens* strains with the gene deletion cassettes and the CRISPR/Cas9 expression  
369 system were grown overnight, diluted to an OD<sub>600</sub> ~0.1, and incubated for 4 to 6 h in  
370 shaking cultures (30°C) in liquid induction medium (IM) until OD<sub>600</sub> reached a value of  
371 0.6 to 0.8. These bacterial cellular suspensions were mixed in 1:1, 1:2, and 2:1 ratio,  
372 respectively, and they were added to *M. furfur* cellular suspension at 1:2 and 1:5 ratios,  
373 respectively. These cellular suspensions were centrifuged at 5200 g for 15 min, the  
374 supernatants were discarded, and ~500 µl to 1 mL of these fungal and bacterial mixes  
375 were spotted directly onto nylon membranes placed on mM agar containing 200 µM  
376 acetosyringone. These were coincubated for 5 days at room temperature (plates  
377 maintained without Parafilm) prior to transferring the dual cultures to mDixon  
378 supplemented with NAT (100 µg/mL) to select for fungal transformants and cefotaxime  
379 (350 µg/mL) to inhibit *Agrobacterium* growth.

380 *M. furfur* transformants resistant to NAT were colony purified and subjected to  
381 phenotypic and molecular characterization. Putative mutants for the *CDC55* gene were  
382 exposed to UV light (250 to 300  $\mu$ J x 100) to identify those with impaired growth  
383 according to the results of the forward genetic screen. For molecular analysis, 23  
384 representative NAT resistant transformants sensitive to UV light were subjected to  
385 phenol-chloroform-isoamyl alcohol (25:24:1) DNA extraction, and the correct  
386 replacement of the target loci was assessed by PCR. Diagnostic PCRs to identify  
387 homologous recombination events for the *CDC55* gene were carried out with primers  
388 JOHE45213 or JOHE45874 in combination with specific primers for the *NAT* gene  
389 (JOHE43281 and JOHE43282, respectively), and with primers JOHE45215-JOHE45216  
390 specific for the internal region of *CDC55*. To evaluate the overall rate of homologous  
391 recombination (HR) of the CRISPR/Cas9 system, a larger number of *cdc55* $\Delta$  candidate  
392 mutants were tested for sensitivity to hydroxyurea, which was found to be the stressor  
393 with the strongest phenotype. Similarly, putative *pdr10* $\Delta$  mutants were exposed to FLC  
394 (150  $\mu$ g/mL) for phenotypic characterization, and transformants displaying impaired  
395 growth were subjected to DNA extraction for molecular characterization. Diagnostic  
396 PCRs were carried out using primers JOHE45205 and JOHE45206 alone and in  
397 combination with specific primers for the *NAT* gene (JOHE43281 and JOHE43282,  
398 respectively), and with primers JOHE45207-JOHE45208 specific for the internal region  
399 of *PDR10*. PCR analyses consisted of 34 cycles of denaturation at 94°C for 30 sec,  
400 annealing at 55°C for 30 sec, extension at 72°C of 1 min/kb, with an initial denaturation  
401 at 94°C for 2 min and a final extension at 72°C for 5 min. PCR analyses were performed  
402 using ExTaq (Takara) according the manufacturer's instructions. To detect homologous

403 recombination events at the 3' region of *CDC55* and to amplify the full length *PDR10*  
404 gene, LATAq polymerase (Takara) with Buffer I was used. PCR for *CAS9* was carried out  
405 with ExTaq and the touchdown protocol with primers JOHE46459-JOHE46461. PCR for  
406 the gRNA was carried out with JOHE46465-JOHE46466 using ExTaq as reported above.  
407 All the primers used are listed in Table S1.

408 Phenotypic analysis of the target mutants was performed on mDixon agar by  
409 spotting 1.5  $\mu$ L of 1:10 dilutions of each cellular suspension in the following conditions:  
410 UV (250 to 450  $\mu$ J x 100), hydroxyurea (50 mM), benomyl (50  $\mu$ M), FLC (150  $\mu$ g/mL),  
411 amphotericin B (AmB, 50  $\mu$ g/mL), 5-flucytosine (5FC, 1 mg/mL), caspofungin (Caspofungin,  
412 100  $\mu$ g/mL), cyclosporin A (CsA) at 100  $\mu$ g/mL both alone and in combination with 10  
413 mM of lithium chloride, tacrolimus (FK506) at 100  $\mu$ g/mL both alone and in combination  
414 with 10 mM of lithium chloride, and dimethyl sulfoxide (DMSO, 40  $\mu$ L) which was used  
415 to dissolve benomyl (10 mM).

416

#### 417 **Genomic comparison and phylogeny of the ABC transporter of *M. furfur* and *M.*** 418 ***sympodialis***

419 The predicted amino acid sequences of *S. cerevisiae* Pdr10, Pdr5, Pdr15, Pdr12,  
420 Snq2, Pdr18, Aus1, and Pdr11 were used as queries for tBLASTn and BLASTp searches  
421 against the genomes of *M. furfur* CBS14141 and *M. sympodialis* ATCC 42132 available  
422 on GenBank (WU *et al.* 2015; ZHU *et al.* 2017). The *Malassezia* best hits were retrieved,  
423 and the encoded proteins for *M. furfur* were predicted using Augustus ([http://bioinf.uni-](http://bioinf.uni-greifswald.de/augustus/submission.php)  
424 [greifswald.de/augustus/submission.php](http://bioinf.uni-greifswald.de/augustus/submission.php)) based on RNAseq evidence for UTR regions and  
425 introns.

426 The web portal of ACT Artemis (<https://www.webact.org/WebACT/home>) was  
427 used for synteny analysis of a ~15000 bp region of *M. sympodialis* and *M. furfur*  
428 containing orthologues of the Pdr10 encoding genes. tBLASTx analysis with a E-value of  
429 0.100000 was performed.

430 For phylogeny, the aforementioned predicted ABC transporter proteins were  
431 aligned using MUSCLE and the phylogenetic tree was generated with MEGA 7  
432 (<http://www.megasoftware.net/>) (KUMAR *et al.* 2016) using the maximum likelihood  
433 method (LG model, 5 discrete gamma categories) and 100 bootstrap replications.

434

## 435 **Results**

### 436 **Molecular and phenotypic characterization of *M. furfur* insertional mutants**

437 Insertional mutants of *M. furfur* were generated through AtMT using both *NAT*  
438 and *NEO* dominant drug resistance markers. A total of 767 insertional mutants were  
439 isolated and their growth was tested under several different stress conditions. A total of  
440 19 mutants (~2.5%) with a phenotype different than the WT were selected for further  
441 characterization.

442 Inverse PCR (iPCR) was utilized to identify the genes inactivated by the T-DNA  
443 insertions. The sequenced amplicons were compared to the unannotated *M. furfur*  
444 CBS14141 genome assemblies (one reported in NCBI as *M. furfur* JPLK23, and another  
445 unpublished based on PacBio sequencing) coupled with RNAseq data, which facilitated  
446 the identification of the coding and regulatory sequences. This allowed an accurate  
447 determination of T-DNA insertion sites. Gene names were assigned according to the  
448 *Saccharomyces* Genome Database. Southern blot analysis was performed to determine

449 the number of T-DNA insertions, revealing that 16 transformants harbored single T-DNA  
450 insertions, and 3 transformants had 2 T-DNA insertions (strains 4A10, 4B1, and 6B2)  
451 (Fig. 1). In parallel, iPCR allowed the characterization of 15 T-DNA insertions (Fig. 2).  
452 Six strains had T-DNA insertions within a predicted open reading frame (ORF), 2 strains  
453 had insertions within UTRs, and 3 strains had T-DNA insertions in intergenic regions  
454 with no RNAseq read coverage. Of the remaining 8 strains, 4 were suspected to have  
455 chromosomal rearrangements because the T-DNA borders were found in different  
456 locations in the *M. furfur* CBS 14141 genome, and the junctions between the T-DNA and  
457 the *M. furfur* genome could not be identified in another 4 strains. Table 1 summarizes the  
458 results of the forward genetics approach performed in this study, and properties of the T-  
459 DNA insertions are reported in Figure 2.

460 Two mutants that displayed reduced growth on YNB were identified, and analysis  
461 of the genome sequence flanking the T-DNA revealed insertions in genes involved in  
462 amino acid biosynthesis (Fig. 3A). Strain 6C8 had a non-standard T-DNA insertion that  
463 generated a deletion of ~800 bp in the genome of *M. furfur*. Moreover, we were not able  
464 to identify the sequence of the left border (LB) from iPCR, and the first nucleotides  
465 obtained mapped within the ORF of *TYR1*, which encodes prephenate dehydrogenase, an  
466 enzyme involved in tyrosine biosynthesis (MANNHAUPT *et al.* 1989). Conversely, the  
467 right border (RB) was found within the ORF of the adjacent gene encoding an  
468 uncharacterized protein with no conserved domains that shares similarity with several  
469 other *Malassezia* species and basidiomycetes. Addition of tyrosine did not restore the  
470 growth of strain 6C8 to the WT level (Fig. 3A), which instead was achieved in SD media  
471 supplemented with all amino acids, suggesting the hypothesis that Tyr1 is also involved



472 in the biosynthesis of other amino acids. In strain 2A8, the T-DNA inserted within the  
473 ORF of *ARG1*, which encodes the enzyme arginosuccinate synthetase that catalyzes the  
474 formation of L-argininosuccinate from citrulline and L-aspartate in the arginine  
475 biosynthesis pathway (JAUNIAUX *et al.* 1978). Addition of L-arginine to YNB was  
476 sufficient to restore a WT phenotype, confirming that *M. furfur ARG1* is involved in  
477 arginine biosynthesis (Fig. 3 A).

478 Four insertional mutants that showed decreased growth at elevated temperature  
479 (37°C) were identified. Of these, only strain 7H6 had a standard T-DNA insertion. In  
480 strain 7H6, the T-DNA integrated between 2 genes: downstream of an RNA-binding  
481 domain-containing protein and upstream of *JEN1* (Fig 3B). While the RNA-binding  
482 domain-containing protein is uncharacterized in *S. cerevisiae*, Jen1 is a plasma membrane  
483 monocarboxylate/proton symporter that transports pyruvate, acetate, lactate, and other  
484 substrates (CASAL *et al.* 1999). To assess which gene was affected by the T-DNA  
485 insertion and therefore responsible for the phenotype of interest, an RT-qPCR analysis  
486 was performed. Expression levels were normalized to the *TUB2* gene of *M. furfur* WT  
487 grown at 30°C. Expression of the uncharacterized gene encoding the RNA-binding  
488 domain-containing protein in strain 7H6 was ~60% lower compared to the WT, whereas  
489 expression of *JEN1* was undetectable, indicating that either or both genes could be  
490 responsible for the temperature sensitive phenotype of strain 7H6 (Fig 3 B). The other  
491 transformants that displayed a temperature-sensitive phenotype included strain 5F1  
492 (which showed a chromosomal rearrangement involving the 5' regions of the gene *INO80*  
493 located on chromosome 1 and of the *GDPI* gene located on chromosome 3), strain 6B2  
494 (which had 2 T-DNA insertions, one of which could be identified and was found within

495 the ORF of a uncharacterized RhoGTPase), and strain 7D5 (whose T-DNA insertion  
496 could not be characterized by iPCR) (Table 1).

497 Strain 1 A7 showed increased sensitivity to UV light (250 and 350  $\mu$ J x 100)  
498 compared to WT *M. furfur* CBS 14141 (Fig. 3C). In strain 1A7, the T-DNA inserted into  
499 the third exon of the *CDC55* gene. In *S. cerevisiae*, *CDC55* encodes a regulatory subunit  
500 of protein phosphatase 2A. *CDC55* is involved in cell cycle control, and it is required for  
501 successful chromosome segregation and nuclear division (HEALY *et al.* 1991; BIZZARI  
502 AND MARSTON 2011).

503 Six strains showed increased sensitivity to the antifungal fluconazole (FLC, 150  
504  $\mu$ g/ml) compared to the WT strain (Fig. 3D). Strain 6A10 had a T-DNA insertion in the  
505 predicted stop codon of the *S. cerevisiae* ortholog *SIP5*. The function of this protein is  
506 unknown, and it has no known domains. However, it has been reported to interact with  
507 both the Reg1/Glc7 phosphatase and the Snf1 kinase in response to glucose starvation  
508 (SANZ *et al.* 2000). In strain 7D9, the T-DNA was found in the intergenic region between  
509 the 5' end of an ATP-binding cassette (ABC) multidrug transporter gene and the 3' end of  
510 the *UBC6* gene. As shown in Figure 6E, the closest *S. cerevisiae* homolog is the ABC  
511 transporter *PDR10*, which is the designation that we adopted. ABC multidrug  
512 transporters are involved in pleiotropic drug responses that mediate resistance to  
513 xenobiotic compounds including mutagens, fungicides, steroids, and anticancer drugs  
514 (SIPOS AND KUCHLER 2006). *UBC6* encodes a ubiquitin-conjugating enzyme involved in  
515 ER-associated protein degradation (WALTER *et al.* 2001). As confirmed by targeted  
516 mutagenesis (discusses below), the FLC-sensitive phenotype of strain 7D9 is due to T-  
517 DNA insertion in the promoter region of *PDR10*.

518 In strain 7F8 the T-DNA inserted within the 3'UTR of *ADY2* (Fig. 3D). *ADY2*  
519 encodes an ammonium and acetate transmembrane transporter involved in nitrogen  
520 utilization (RABITSCH *et al.* 2001; PAIVA *et al.* 2004). In strain 2H11 T-DNA integration  
521 generated a rearrangement involving the *ERG5* gene and the region close to the 5' end of  
522 the *PDA1* gene. In addition to increased sensitivity to FLC, this strain showed increased  
523 sensitivity to sodium chloride compared to WT. Erg5 is a cytochrome P450 enzyme that  
524 is a C-22 sterol desaturase involved in ergosterol biosynthesis (LEES *et al.* 1995).  
525 Although it is known that FLC targets membrane ergosterol, and *ERG5* deletion in *S.*  
526 *cerevisiae* leads to increased FLC sensitivity (KAPITZKY *et al.* 2010), it cannot be  
527 excluded that the FLC and NaCl sensitivity of strain 2H11 is due both to *ERG5* mutation  
528 and the intrachromosomal rearrangement itself. In strains 2G9 and 5D11, the T-DNA  
529 likely integrated in tandem repeats because iPCR amplicons consisted of both the left and  
530 right borders of the T-DNA fused together, and this prevented retrieval of the junctions  
531 between the T-DNA and the genome.

532 Three strains showed sensitivity to cadmium sulfate (CdSO<sub>4</sub>, 30 μM), and only  
533 one (strain 2F4) showed a standard T-DNA insertion in the 5' regions of both *SEC13* and  
534 *PRP43* (Fig. 3E). *SEC13* in *S. cerevisiae* encodes an essential protein that is a structural  
535 component of the COPII (coat protein complex II), of the nuclear pore outer ring, and of  
536 the Seh-1 associated complex. It is involved in COPII-coated vesicle budding from the  
537 ER to the Golgi, nuclear pore distribution, and the ubiquitin-dependent ERAD (ER-  
538 associated ubiquitin-dependent protein breakdown) pathway, which is involved in protein  
539 degradation by cytoplasmic proteasomes (MENON *et al.* 2005; DOKUDOVSKAYA *et al.*  
540 2011; ČOPIČ *et al.* 2012). *S. cerevisiae* *PRP43* encodes an RNA helicase protein that is

541 also essential for viability and contributes to the biogenesis of ribosomal RNA, and it is  
542 also involved in spliceosomal complex disassembly (ARENAS AND ABELSON 1997;  
543 GIAEVER *et al.* 2002). qPCR did not show clear downregulation of either gene (data not  
544 shown), and whether either or both genes are responsible for the cadmium sulfate-  
545 sensitive growth defect remains to be established. Because the T-DNA inserted in the 5'  
546 region of *SEC13* and *PRP43*, whose orthologs are essential in *S. cerevisiae*, we speculate  
547 that the functions of both genes are affected or that the phenotype observed is unlinked to  
548 the T-DNA insertion. In strain 3A1, a rearrangement involving the *JLP2* and *TCPI* genes  
549 was found, and for strain 4B1, Southern blot indicated 2 T-DNA insertions, one of which  
550 was identified and found within the 3'UTR of the *MAE1* gene, which encodes a  
551 mitochondrial malic enzyme that is important for sugar metabolism and acts as a  
552 precursor for many amino acids (BOLES *et al.* 1998). For strain 1F12, iPCR using  
553 different restriction enzymes was unsuccessful. We also identified a strain (4A10) that  
554 was sensitive to sodium nitrite (NaNO<sub>2</sub>) and SDS. According to Southern blot analysis,  
555 strain 4A10 has 2 T-DNA insertions, one of which could be identified and was found in  
556 an uncharacterized enoyl-CoA hydratase gene. Another strain (5F10) was sensitive to  
557 NaCl and iPCR revealed the presence of a chromosomal rearrangement involving the 3'  
558 region of the *DUG1* gene and the 5' UTR of the *RPC10* gene.

559

560 **Development of a CRISPR/Cas9 gene deletion system to generate *cdc55*Δ *M. furfur***  
561 **mutants**

562 To validate the results of the insertional mutagenesis screen, the insertional  
563 mutants 1A7 and 7D9 and their mutated genes were chosen for further analysis as a proof

564 of principle. First, we focused on the UV-sensitive strain 1A7 with a T-DNA insertion in  
565 the *CDC55* gene. We were intrigued by this strain because *CDC55* mutation is not known  
566 to be responsible for UV sensitivity in other fungi. The aim was to generate an *M. furfur*  
567 *cdc55*Δ targeted mutant, determine if the UV phenotype of the original insertional mutant  
568 is attributable to *CDC55* mutation, and investigate any further functions of the gene in *M.*  
569 *furfur*.

570 For targeted mutagenesis of *CDC55*, molecular biology techniques were  
571 performed following our previously published methods (IANIRI *et al.* 2016). Regions of  
572 1500 and 1000 bp flanking the 5' and 3' ends of the *CDC55* target gene, respectively,  
573 were amplified from *M. furfur* genomic DNA and fused with the *NAT* marker within the  
574 T-DNA borders of plasmid pGI3. The recombinant plasmid (pGI41) bearing the  
575 *cdc55*Δ::*NAT* allele was identified in *S. cerevisiae* by colony PCR and *A. tumefaciens*  
576 EHA105 transformed by electroporation. Several rounds of *Agrobacterium*-  
577 transconjugation were performed, and *NAT*-resistant transformants of *M. furfur* were  
578 single colony-purified and subjected to diagnostic PCR to confirm *CDC55* targeted  
579 mutagenesis. None of the transformants tested (0 out of more than 100) showed full  
580 replacement of the gene *CDC55*.

581 Next we developed a CRISPR/Cas9 system for *M. furfur* to increase homologous  
582 recombination efficiency. Because the plasmid for targeted gene replacement of *CDC55*  
583 was already available, we generated an additional plasmid to make a DNA DBS in  
584 *CDC55*, and then used the available *cdc55*Δ::*NAT* allele as HDR template to repair the  
585 break. For expression of Cas9, the ORF of the *CAS9* endonuclease was cloned under the  
586 control of the strong promoter and terminator of the histone *H3* gene of *M. symposiumalis*

587 ATCC42132. To drive expression of gRNA specific for the target *CDC55* gene, the  
588 promoter of the 5S rRNA was chosen. Because the ribosomal cluster is well annotated in  
589 the newly released genome of *M. sympodialis* (ZHU *et al.* 2017) and we have evidence  
590 that *M. sympodialis* promoters and terminators are functional in *M. furfur* (IANIRI *et al.*  
591 2016), a 689 bp region including the 5S rRNA and its upstream region was amplified  
592 from *M. sympodialis* ATCC42132. The forward primer for the p5S rRNA contained  
593 restriction sites for SacII and SpeI to facilitate genetic manipulations. The scaffold gDNA  
594 also was obtained by PCR, and 6 thymine residues (6-T) were included as terminator. A  
595 20-nt oligonucleotide target of gRNA was designed to match a region of the *CDC55* gene  
596 adjacent to a PAM site, and it included the 5' and 3' regions that overlapped with the 5S  
597 rRNA promoter and the gRNA scaffold, respectively. This target oligonucleotide was  
598 added to the gRNA scaffold through PCR as reported in Figure 4B. The 5 PCR fragments  
599 (pH3; *CAS9*; tH3; p5S rRNA; gRNA) were used as template for overlap PCRs, and two  
600 final amplicons (pH3-*CAS9*-tH3 and p5SrRNA-gRNA) were cloned in pPZP201BK to  
601 generate plasmid pGI40 (Table 2) (Figures 4A and 4B).

602 AtMT of *M. furfur* CBS14141 was conducted to test the developed CRISPR/Cas9  
603 system to generate targeted gene replacement of the *CDC55* gene. Since our previous  
604 reports of AtMT of *Malassezia* (IANIRI *et al.* 2016; IANIRI *et al.* 2017), we have  
605 optimized the protocol to achieve a higher transformation efficiency. The main change  
606 included the use of a 2:1 to 5:1 *Malassezia:A. tumefaciens* mixture that was concentrated  
607 through centrifugation before the coincubation step on modified induction media [mIM,  
608 (IANIRI *et al.* 2016)]. The detailed procedure is reported in the Materials and Methods.  
609 For co-transformation of *M. furfur* using *A. tumefaciens* strains bearing the binary vectors

610 pGI40 (CRISPR/Cas9 expression system) and pGI41 (HDR *cdc55Δ::NAT* template),  
611 induced bacterial strains were mixed in ratios of 1:1, 1:2, and 2:1, then added to ratios of  
612 1:2 and 1:5 with *M. furfur* cells (Fig. 5A). The co-cultures were centrifuged to eliminate  
613 the supernatants, and the pellet containing the mix of the 3 components was spotted on  
614 nylon membranes placed on mM agar. The plates were incubated at room temperature  
615 for 5 days without parafilm. The coincubation cultures were recovered and plated on  
616 mDixon containing NAT and CEF. A representative subset of 23 *M. furfur* transformants  
617 was single colony-purified and subjected to molecular characterization through PCR.  
618 Genotyping was performed using 1) primers designed beyond the regions of DNA used  
619 in the generation of the deletion allele in combination with specific *NAT* primers; 2)  
620 primers internal to the gene *CDC55*; 3) primers specific for the *CAS9* genes, and primers  
621 specific for the gRNA (Figure 5B). Specific amplicons of ~1.6 kb and ~1.4 kb for the 5'  
622 (left) and 3' (right) T-DNA-genomic DNA junctions, respectively, were obtained for all  
623 of the 23-randomly selected transformants. Accordingly, the internal region of *CDC55*  
624 was amplified only from the WT strain. No amplicons for *CAS9* or the gRNA were  
625 obtained. These results indicate that all transformants tested had full replacement of the  
626 *CDC55* gene and absence of *CAS9* and gRNA integration in the genome (Fig. 5C).  
627 Furthermore, 64 additional random *cdc55Δ* mutant candidates were tested for sensitivity  
628 to hydroxyurea, which we found to be the most effective stressor for the *cdc55Δ*  
629 phenotype, and found that 62 displayed impaired growth compared to WT (Fig. S1).  
630 Therefore, molecular and phenotypic analyses revealed that out of 87 transformants  
631 analyzed, 85 were *cdc55Δ* mutants, resulting in a rate of homologous recombination of  
632 97.7%.

633 In *S. cerevisiae*, *CDC55* positively regulates mitotic entry at the G2/M phase  
634 transition and negatively regulates mitotic exit, and it regulates the mitotic spindle  
635 assembly and the morphogenesis checkpoint (WANG AND BURKE 1997; BIZZARI AND  
636 MARSTON 2011). Null *cdc55* $\Delta$  mutants display abnormally elongated buds; decreased  
637 growth rate; and increased sensitivity to gamma rays and hydroxyurea (DNA-damaging  
638 agents that interfere with DNA replication), to benomyl and nocodazole (which interfere  
639 with microtubule polymerization), and cold-induced stress. Phenotypic characterization  
640 of 2 representatives independent *cdc55* $\Delta$  *M. furfur* mutants confirmed that they were  
641 sensitive to UV light (Fig. 5D), corroborating the phenotype of the insertional mutant  
642 1A7. Moreover, the *M. furfur cdc55* $\Delta$  mutant had a slower growth rate compared to the  
643 WT strain, and increased sensitivity to hydroxyurea and benomyl (Fig. 5D). Due to the  
644 inability of *M. furfur* WT to grow at low temperature, cold sensitivity could not be  
645 determined for *M. furfur cdc55* $\Delta$ . *M. furfur cdc55* $\Delta$  mutants were subjected to  
646 microscopy analysis both under normal and stress conditions, and when exposed to  
647 hydroxyurea they displayed cells with abnormal morphology and elongated buds, similar  
648 to *S. cerevisiae cdc55* $\Delta$  mutants (Fig. 5E).

649

#### 650 **Generation of a *pdr10* $\Delta$ *M. furfur* mutant with CRISPR/Cas9**

651 The other insertional mutant of interest was strain 7D9, which has a T-DNA  
652 insertion between the *PDR10* and *UBC6* genes and exhibited FLC sensitivity. It was  
653 hypothesized that the phenotype of strain 7D9 was due to the T-DNA interfering with the  
654 function of *PDR10*, which is well known to mediate antifungal drug response and  
655 therefore was chosen for targeted mutagenesis. In *M. furfur*, *PDR10* is a large, 4470-bp



656 gene. The *pdr10Δ::NAT* gene disruption cassette was generated as previously described  
657 for *CDC55*, and the vector was named pGI42. For the gRNA, a primer with a specific  
658 *PDR10* target between regions that overlap with the 5S rRNA promoter and the gRNA  
659 scaffold was added to the gRNA scaffold by PCR. The resulting amplicon was then  
660 cloned together with the p5S rRNA in the T-DNA of pGI40 digested with *SpeI* as  
661 reported in Figure 4B; this vector was named pGI48.

662 Co-transformation of *M. furfur* CBS14141 was performed using *A. tumefaciens*  
663 strains bearing plasmids pGI42 and pGI48 as reported in Figure 5A. 60 *M. furfur* NAT-R  
664 transformants were single colony purified, and streaked onto mDixon + FLC. Five (8.3%)  
665 transformants that displayed FLC sensitivity plus a randomly-selected FLC-resistant  
666 control strain were subjected to molecular characterization (Fig. 6B). PCR analysis using  
667 external screening primers designed beyond the region of DNA utilized to generate the  
668 *pdr10Δ::NAT* deletion allele produced 2 amplicons: a 6183-bp amplicon for the WT and  
669 the FLC resistant strain, and a 3933-bp amplicon for the 5 transformants that displayed  
670 FLC sensitivity. For these 5 transformants, PCR carried out using the external primers  
671 with specific *NAT* primers generated amplicons of ~1.1 kb and ~1.3 kb on the 5' and 3'  
672 regions, respectively. PCR using primers internal to the *PDR10* gene generated an  
673 amplicon of 486 bp only in the WT and the randomly selected NAT-R strain. These PCR  
674 results indicate full replacement of the *PDR10* gene in the 5 transformants that displayed  
675 FLC sensitivity.

676 Mutants *pdr10Δ* showed hypersensitivity to FLC, indicating that the phenotype of  
677 strain 7D9 was due to the T-DNA interfering with the function of *PDR10*. Moreover,  
678 because ABC transporters are known to be involved in pleiotropic drug resistance and

679 cellular detoxification, the phenotypic response of *pdr10Δ* mutants was tested against  
680 other antifungal drugs of clinical relevance. Surprisingly, *M. furfur pdr10Δ* mutants  
681 showed only sensitivity to FLC and grew at the WT level on amphotericin B, 5-  
682 flucytosine, caspofungin, tacrolimus (FK506), and cyclosporine A (CsA) both alone and  
683 in combination with the plasma membrane stressor lithium chloride (Fig. 6C and data not  
684 shown), which we previously showed enhances antifungal activity of tacrolimus against  
685 *M. furfur* (IANIRI *et al.* 2017). Moreover, *M. furfur pdr10Δ* mutants did not display  
686 sensitivity to the DNA-damaging agents UV or hydroxyurea and only displayed  
687 sensitivity to the fungicide benomyl (Fig. 6C).

688 During BLAST searches, we noted that *M. furfur* has 2 adjacent ABC transporter-  
689 encoding genes that are orthologs of 3 adjacent ABC transporter-encoding genes in *M.*  
690 *sympodialis* (Fig. 6D), a *Malassezia* species that we use as a model for genomics  
691 comparison within the genus because of the high quality of its genome assembly (ZHU *et*  
692 *al.* 2017). Interestingly, BLASTp of these ABC transporters against *S. cerevisiae*  
693 revealed high similarity (ie E-value 0.0) with several ABC transporters, such as Pdr18,  
694 Pdr12, Pdr5, Pdr10, Pdr15, Aus1, and Pdr11. Reciprocal BLAST (BLASTp and  
695 tBLASTn) of these proteins against *M. furfur* and *M. sympodialis* finds only the  
696 aforementioned adjacent ABC transporters, which we named *Mf* (*M. furfur*) and *Ms* (*M.*  
697 *sympodialis*) *PDR10\_1*, *PDR10\_2*, and *PDR10\_3*. The mutated gene in *M. furfur*  
698 corresponds to *PDR10\_1*. Phylogenetic analysis revealed that ABC transporters of *M.*  
699 *furfur* and *M. sympodialis* cluster together in a maximum likelihood tree and are related  
700 to the *S. cerevisiae* Pdr10 ABC transporter, which is the gene designation that we  
701 selected. This analysis suggests a common duplication event of the *Malassezia PDR10*

702 (green dot on Fig. 6E), followed by another more recent duplication in *M. sympodialis*

703 (blue dot on Fig. 6E).

704

705

706

707

708

709

710

711

712

713

714

715

## 716 **Discussion**

717 *A. tumefaciens*-mediated transformation is considered a “silver bullet” in  
718 functional genomics of fungi, and its main applications as well as the major discoveries  
719 that it has allowed have been recently reviewed (IDNURM *et al.* 2017a). Because *A.*  
720 *tumefaciens* can grow under a variety of conditions, the transformation method is  
721 versatile and has been successfully applied in a number of fungi, including those with  
722 particular nutrient requirements and that are recalcitrant to other transformation  
723 approaches, such as *Malassezia* (IANIRI *et al.* 2016; CELIS *et al.* 2017).

724 In this report, we present the first application of forward genetics in *M. furfur*, a  
725 representative species of the fungemia-causing *Malassezia* group. The goal was to  
726 generate random insertional mutants, expose them to stress conditions to isolate those  
727 displaying sensitivity compared to the WT, and identify the corresponding T-DNA  
728 insertion sites to determine the function of the genes causing the phenotypes. Given the  
729 lack of knowledge on gene function in *Malassezia*, insertional mutants were assayed on a  
730 variety of conditions that are known to interfere with i) important cellular processes, such  
731 as those involved in plasma membrane and cell wall maintenance, growth under nutrient  
732 limiting conditions, and protein folding; ii) response to environmental stresses, such as  
733 osmotic and nitrosative stresses, UV light, elevated temperature and pH, and heavy  
734 metals; and iii) response to the antifungal FLC, which is of clinical relevance.

735 This loss-of-function screen allowed the characterization of 8 *M. furfur* insertional  
736 mutants (1A7, 2A8, 2F4, 6A10, 6C8, 7D9, 7F8, 7H6) that had 1 T-DNA insertion as  
737 determined by Southern blot analysis (Fig. 1) and that displayed sensitivity to one or  
738 more stress conditions (Fig. 3; Table 1). In 4 strains, the T-DNA inserted within the ORF  
739 of genes, and in another it was found to lie within a 3' UTR (Table 1, Fig. 2 - 3), thus  
740 allowing us to define with high probability a direct link between genotype and phenotype.  
741 Clear examples of this were *M. furfur* transformants 2A8 and 1A7. Strain 2A8 was  
742 selected because of its reduced growth on minimal medium (YNB), and it was found to  
743 have a T-DNA insertion in the *ARG1* gene. Strain 1A7 was selected for its increased  
744 sensitivity to UV light, and found to have a T-DNA insertion in the *CDC55* gene. Two  
745 different approaches were employed to validate the findings of the insertional  
746 mutagenesis screen. For strain 2A8 the addition of arginine was sufficient to rescue

747 growth to a WT level (Fig. 3A), while for strain 1A7, targeted *M. furfur cdc55Δ* mutants  
748 (Fig. 5) confirmed UV sensitivity.

749 In 3 other mutants of interest, the T-DNA inserted between 2 adjacent genes, and  
750 further experiments were conducted to identify the gene(s) responsible for the observed  
751 phenotype. A successful approach for strain 7H6 was gene expression analysis through  
752 RT-qPCR, which revealed downregulation of both genes flanking the T-DNA insertion  
753 (Fig. 3B). Strain 7D9 was sensitive to FLC and had a T-DNA insertion between the 3'  
754 region of *UBC6* and 5' region of *PDR10*, and targeted mutagenesis confirmed that the  
755 observed phenotype was due to T-DNA insertion in the promoter region of *PDR10* (Fig.  
756 6). Lastly, the RT-qPCR approach did not allow us to define which genes was responsible  
757 for the cadmium sulfate sensitive phenotype of strain 2F4 (data not shown).

758 Despite the benefits of an AtMT random mutagenesis approach, analysis of the T-  
759 DNA insertion events also revealed limitations. Eleven of 19 *M. furfur* insertional  
760 mutants selected (~58%) were not useful for gene function analysis. Three transformants  
761 had 2 T-DNA insertions as determined by Southern blot analysis (Fig. 1), and although  
762 we determined at least one insertion site (Table 1), it was not possible to determine which  
763 gene was responsible for the mutant phenotype. Moreover, the insertion sites could not be  
764 identified through iPCR for 2 transformants (1F12 and 7D5). Strains 2G9 and 5D11  
765 contained tandem T-DNA insertions, and in 4 strains (2H11, 3A1, 5F1, 5F10),  
766 chromosomal rearrangements following the integration of the T-DNA in the *M. furfur*  
767 genome were observed. Although AtMT represents a powerful method for random  
768 mutagenesis, we and other authors have commonly found non-standard T-DNA insertion  
769 events in the genome of both ascomycetous and basidiomycetous fungi [for more details

770 see the following reviews and references within them (MICHIELSE *et al.* 2005; BOURRAS  
771 *et al.* 2015; IDNURM *et al.* 2017a; HOOYKAAS *et al.* 2018)]. For example, in a recent study  
772 on systematic T-DNA insertion events in the red yeast *Rhodospiridium toruloides*,  
773 Coradetti and colleagues found that only 13% of mutants had regular T-DNA insertions  
774 and a total of 21% of insertions were useful to identify the genes mutated by the T-DNA  
775 (CORADETTI *et al.* 2018). Moreover, in classical forward genetic screens in which loss-of-  
776 function events are selected, it is common to isolate strains with chromosomal  
777 rearrangements that originated following the insertion of the T-DNA, because these  
778 strains are generally less fit and display increased sensitivity to stress (IANIRI AND  
779 IDNURM 2015). These undesirable events have been also described following AtMT of  
780 plants (CLARK AND KRYSAN 2010).

781       Typically in forward genetics the linkage between the T-DNA insertion and the  
782 phenotype is confirmed through: 1) sexual crosses and analysis of the phenotype in the  
783 recombinant progeny, 2) functional complementation, or 3) generation an independent  
784 targeted mutation for the gene identified (IDNURM *et al.* 2017a). Because of the lack of a  
785 known sexual cycle in *Malassezia*, and the difficulty of genetic manipulations for  
786 complementation studies, in the present study we aimed to generate *M. furfur* mutants for  
787 the genes *CDC55* and *PDR10* to validate their involvement in UV and FLC resistance,  
788 respectively. Following our previously reported protocol for targeted mutagenesis in *M.*  
789 *furfur* (IANIRI *et al.* 2016; IANIRI *et al.* 2017), several transformation rounds were  
790 performed, but we did not obtain any *CDC55* or *PDR10* mutants. Therefore, a system  
791 based on CRISPR/Cas9 was developed to increase homologous recombination and  
792 facilitate the generation of targeted mutants in *M. furfur*.

793           Because AtMT is the only effective transformation technique for *Malassezia*, a  
794 functional *CAS9* cassette and a gRNA needed to be cloned within the T-DNA of a binary  
795 vector, together with a marker for selection. For homologous recombination-mediated  
796 targeted mutagenesis, a specific gene replacement construct to serve as template to repair  
797 the BSB was also necessary. Cloning of all the required components within the T-DNA  
798 of one binary vector is technically challenging and time consuming. In one study, Kujoth  
799 and colleagues generated a large T-DNA that included one or more gRNA, a Cas9  
800 expression cassette, and a gene marker, and successfully applied this system in gene  
801 editing strategies through NHEJ in *Blastomyces dermatitidis* (KUJOTH *et al.* 2018). For  
802 CRISPR/Cas9 in *Leptosphaeria maculans*, Idnurm and colleagues reported a system  
803 based on 2 binary vectors, one with *CAS9* and a marker, and the other with gRNA and  
804 another marker, that could be successfully delivered at the same time through co-  
805 transformation employing *A. tumefaciens* to perform efficient gene editing through NHEJ  
806 (IDNURM *et al.* 2017b). For CRISPR/Cas9 of *Malassezia*, we opted for a system that  
807 would be suitable for targeted gene replacement through homologous recombination  
808 based on co-transformation of *M. furfur* with 2 *A. tumefaciens* strains, one bearing the  
809 binary vector with the HDR gene deletion allele, and another with a binary vector  
810 engineered for the CRISPR/Cas9 system without a gene marker. The rationale for  
811 generating a marker-free binary vector was to: 1) have a CRISPR/Cas9 transient  
812 expression system with a reduced rate of *CAS9* and/or gRNA ectopic integration in the  
813 host genome, similar to a system developed for *C. albicans* and *C. neoformans* (MIN *et*  
814 *al.* 2016; FAN AND LIN 2018); 2) allow further genetic manipulation of the *NAT*-generated  
815 mutant using the other *Malassezia*-specific gene marker available, which encodes for

816 resistance to neomycin; and 3) reduce recombination within the actin promoter and  
817 terminator regions of the *NAT* and *NEO* gene markers.

818         Considering gRNA expression, the choice of an appropriate promoter has  
819 represented a major challenge for the application of CRISPR/Cas9 technology in fungi.  
820 Currently, common approaches include the use of a strong promoter recognized by RNA  
821 polymerase II, such as that of the *ACT1* or *GDPI* genes, coupled with a hammerhead  
822 ribozyme and/or hepatitis delta virus ribozyme for gRNA excision (IDNURM *et al.* 2017b;  
823 KUJOTH *et al.* 2018); the use of RNA polymerase III promoters, such as the U6 promoters  
824 of small nuclear RNA used for *C. neoformans* (WANG *et al.* 2016; FAN AND LIN 2018);  
825 or the promoters of the tRNA or rRNA with or without ribozymes (SHI *et al.* 2017). In  
826 this study, we first tested a strategy based on the use of the 5S rRNA promoter of *M.*  
827 *sympodialis* (Fig. 4B). While we were working on developing this system, Zheng and  
828 colleagues reported a similar approach in *A. niger*, demonstrating high efficiency of gene  
829 editing using both the 5S rRNA promoter alone or combined with the HDV ribozyme  
830 (ZHENG *et al.* 2018). Cas9 expression is usually achieved using a strong promoter and  
831 terminator; in this study the regulatory regions of the histone *H3* gene of *M. sympodialis*  
832 served this purpose (Fig. 4A). During the first CRISPR/Cas9 attempt, we were able to  
833 generate *M. furfur cdc55Δ* mutants. Surprisingly, both molecular and phenotypic analysis  
834 revealed a homologous recombination rate of 98% (Fig 4C, and Fig. S1). This high rate  
835 of homologous recombination is similar to that in the study of Zheng and colleagues  
836 (ZHENG *et al.* 2018) and other CRISPR/Cas9-mediated gene deletion approaches (FAN  
837 AND LIN 2018). Given these positive results, the use of ribozymes flanking the 5S rRNA  
838 promoter was not tested. Phenotypic analysis confirmed the involvement of *CDC55* in



839 UV resistance, and further assays revealed sensitivity of the *M. furfur cdc55* $\Delta$  mutant to  
840 benomyl and hydroxyurea (Fig. 5D), which also induced an abnormal bud morphology  
841 (Fig. 5E). This indicates a conserved function of the cell division cycle protein Cdc55 in  
842 *M. furfur* and *S. cerevisiae*.

843 This CRISPR/Cas9 technology was then tested for targeted mutagenesis of  
844 another gene of interest, *PDR10*. Corroborating results obtained for *CDC55*, we were  
845 able to promptly obtain *pdr10* $\Delta$  mutants, although the rate of homologous recombination  
846 was lower for this gene. This could be due to several factors, such as shorter flanking  
847 regions of ~800 bp used in the HDR *pdr10* $\Delta$ ::*NAT* template, the length of the *PDR10*  
848 gene (more than 4 Kb), the genomic location, or to lower activity of the *PDR10*-specific  
849 gRNA. Analysis of *M. furfur pdr10* $\Delta$  mutants revealed an unexpected specificity of *M.*  
850 *furfur PDR10* for resistance to the clinical-relevant drug FLC, and to the antifungal agent  
851 benomyl (Fig. 6C). While there are multiple studies on the pleiotropic drug resistance  
852 function of ABC transporters in non-pathogenic (*S. cerevisiae*) and pathogenic (*C.*  
853 *albicans*) yeasts (SIPOS AND KUCHLER 2006; COSTE *et al.* 2008; PAUL AND MOYE-  
854 ROWLEY 2014), in these cases specific analysis of Pdr10 in response to several drugs has  
855 yet to be performed, and therefore it is not possible to provide a detailed comparison  
856 analysis that supports conserved or divergent functions of *PDR10* in *M. furfur*. A recent  
857 study reported the involvement of *S. cerevisiae* Pdr10 in double-strand break repair via  
858 sister chromatid exchange (MUÑOZ-GALVÁN *et al.* 2013), but we could not confirm this  
859 function in *M. furfur* because of the lack of sensitivity of *pdr10* $\Delta$  mutants to DNA-  
860 damaging agents (Fig. 5C). Further bioinformatics analyses revealed that Pdr10 is the  
861 only ABC transporter present in the genome of two *Malassezia* species, and that it

862 underwent ancestral and more recent gene duplication events (Fig. 6D-E). This suggests  
863 profound differences with other fungi, and further studies are needed to elucidate the  
864 evolution and specific roles of these *Malassezia* ABC transporters in resistance to  
865 chemicals and their network of interactions.

866 Our understanding of *Malassezia* genetics is still limited, and the T-DNA-  
867 mediated random insertional mutagenesis applied in this study coupled with a novel and  
868 efficient CRISPR/Cas9 system represent straightforward approaches to advance  
869 molecular genetics in this understudied organism. Indeed, while T-DNA-mediated  
870 random insertional mutagenesis is of particular relevance to discover novel gene  
871 functions, such as the UV sensitive phenotype of *CDC55*, or the FLC sensitivity due to  
872 mutations in the genes *SIP5* and *ADY2*, the efficiency of CRISPR/Cas9 is a critical  
873 requirement to perform large-scale analyses while also validating the results of the  
874 genetics screen.

875 Historically *Malassezia* research has been hampered by the fastidious nature and  
876 particular growth requirements of species within this genus and by their difficult  
877 identification and classification. Nevertheless, in addition to the available genome  
878 sequence and annotation of most *Malassezia* species, the recent introduction of animal  
879 models to study *Malassezia* interactions with the skin and the gastrointestinal tract  
880 (LIMON *et al.* 2019; SPARBER *et al.* 2019), and the development of this novel  
881 CRISPR/Cas9 system and other existing molecular technologies (IANIRI *et al.* 2016;  
882 CELIS *et al.* 2017; IANIRI *et al.* 2017) represent key scientific advances to study the  
883 biology and pathophysiology of *Malassezia*, the main fungal inhabitants of mammalian  
884 skin.

885

886 **ACKNOWLEDGMENTS**

887 We thank Sheng Sun for assistance with Southern blot analysis, and Tom Dawson  
888 for sharing unpublished genome and RNAseq information prior to publication. We thank  
889 Ci Fu, Shelby Priest and Cecelia Wall for critical comments on the manuscript.

890

891 **FUNDING INFORMATION**

892 This work was supported by NIH/NIAID R01 grant AI50113-15 and by  
893 NIH/NIAID R37 MERIT award AI39115-21 (to J.H.).

894

895

896

897

898

899

900

901

902

903

904

905 **References**

906 Adli, M., 2018 The CRISPR tool kit for genome editing and beyond. *Nature*  
907 *Communications* 9: 1911.  
908 Amend, A., G. Burgaud, M. Cunliffe, V. P. Edgcomb, C. L. Ettinger *et al.*, 2019 Fungi in  
909 the marine environment: open questions and unsolved problems. *mBio* 10:  
910 e01189-01118.

- 911 Arenas, J. E., and J. N. Abelson, 1997 Prp43: An RNA helicase-like factor involved in  
912 spliceosome disassembly. *Proceedings of the National Academy of Sciences*  
913 94: 11798-11802.
- 914 Arras, S. D., S. M. Chua, M. S. Wizrah, J. A. Faint, A. S. Yap *et al.*, 2016 Targeted genome  
915 editing via CRISPR in the pathogen *Cryptococcus neoformans*. *PLoS One* 11:  
916 e0164322.
- 917 Bizzari, F., and A. L. Marston, 2011 Cdc55 coordinates spindle assembly and  
918 chromosome disjunction during meiosis. *J Cell Biol* 193: 1213-1228.
- 919 Boles, E., P. de Jong-Gubbels and J. T. Pronk, 1998 Identification and  
920 Characterization of *MAE1*, the *Saccharomyces cerevisiae* structural gene  
921 encoding mitochondrial malic enzyme. *Journal of Bacteriology* 180: 2875-  
922 2882.
- 923 Bourras, S., T. Rouxel and M. Meyer, 2015 *Agrobacterium tumefaciens* gene transfer:  
924 how a plant pathogen hacks the nuclei of plant and nonplant organisms.  
925 *Phytopathology* 105: 1288-1301.
- 926 Byrd, A. L., Y. Belkaid and J. A. Segre, 2018 The human skin microbiome. *Nat Rev*  
927 *Microbiol* 16: 143-155.
- 928 Casal, M., S. Paiva, R. P. Andrade, C. Gancedo and C. Leão, 1999 The lactate-proton  
929 symport of *Saccharomyces cerevisiae* is encoded by *JEN1*. *Journal of*  
930 *Bacteriology* 181: 2620-2623.
- 931 Celis, A. M., A. M. Vos, S. Triana, C. A. Medina, N. Escobar *et al.*, 2017 Highly efficient  
932 transformation system for *Malassezia furfur* and *Malassezia pachydermatis*  
933 using *Agrobacterium tumefaciens*-mediated transformation. *J Microbiol*  
934 *Methods* 134: 1-6.
- 935 Cho, Y.-J., M. Park and W. H. Jung, 2019 Resequencing the genome of *Malassezia*  
936 *restricta* strain KCTC 27527. *Microbiology Resource Announcements* 8:  
937 e00213-00219.
- 938 Clark, K. A., and P. J. Krysan, 2010 Chromosomal translocations are a common  
939 phenomenon in *Arabidopsis thaliana* T-DNA insertion lines. *Plant J* 64: 990-  
940 1001.
- 941 Čopič, A., C. F. Latham, M. A. Horlbeck, J. G. D'Arcangelo and E. A. Miller, 2012 ER  
942 cargo properties specify a requirement for COPII coat rigidity mediated by  
943 Sec13p. *Science* 335: 1359-1362.
- 944 Coradetti, S. T., D. Pinel, G. M. Geiselman, M. Ito, S. J. Mondo *et al.*, 2018 Functional  
945 genomics of lipid metabolism in the oleaginous yeast *Rhodospiridium*  
946 *toruloides*. *Elife* 7: e32110.
- 947 Coste, A. T., M. Ramsdale, F. Ischer and D. Sanglard, 2008 Divergent functions of  
948 three *Candida albicans* zinc-cluster transcription factors (*CTA4*, *ASG1* and  
949 *CTF1*) complementing pleiotropic drug resistance in *Saccharomyces*  
950 *cerevisiae*. *Microbiology* 154: 1491-1501.
- 951 Cuomo, C. A., C. A. Desjardins, M. A. Bakowski, J. Goldberg, A. T. Ma *et al.*, 2012  
952 Microsporidian genome analysis reveals evolutionary strategies for obligate  
953 intracellular growth. *Genome Res* 22: 2478-2488.
- 954 Dawson, T. L., 2019 *Malassezia*: The forbidden kingdom opens. *Cell Host & Microbe*  
955 25: 345-347.

- 956 Dokudovskaya, S., F. Waharte, A. Schlessinger, U. Pieper, D. P. Devos *et al.*, 2011 A  
957 conserved coatomer-related complex containing Sec13 and Seh1 dynamically  
958 associates with the vacuole in *Saccharomyces cerevisiae*. *Molecular & Cellular*  
959 *Proteomics* 10: M110. 006478.
- 960 Donnarumma, G., B. Perfetto, I. Paoletti, G. Oliviero, C. Clavaud *et al.*, 2014 Analysis  
961 of the response of human keratinocytes to *Malassezia globosa* and *restricta*  
962 strains. *Arch Dermatol Res* 306: 763-768.
- 963 Fan, Y., and X. Lin, 2018 Multiple Applications of a transient CRISPR-Cas9 coupled  
964 with electroporation (TRACE) system in the *Cryptococcus neoformans* species  
965 complex. *Genetics* 208: 1357-1372.
- 966 Findley, K., J. Oh, J. Yang, S. Conlan, C. Deming *et al.*, 2013 Topographic diversity of  
967 fungal and bacterial communities in human skin. *Nature* 498: 367-370.
- 968 Gaitanis, G., P. Magiatis, M. Hantschke, I. D. Bassukas and A. Velegraki, 2012 The  
969 *Malassezia* genus in skin and systemic diseases. *Clinical Microbiology*  
970 *Reviews* 25: 106-141.
- 971 Giaever, G., A. M. Chu, L. Ni, C. Connelly, L. Riles *et al.*, 2002 Functional profiling of  
972 the *Saccharomyces cerevisiae* genome. *Nature* 418: 387.
- 973 Gioti, A., B. Nystedt, W. Li, J. Xu, A. Andersson *et al.*, 2013 Genomic insights into the  
974 atopic eczema-associated skin commensal yeast *Malassezia sympodialis*.  
975 *mBio* 4: e00572-00512.
- 976 Glatz, M., P. P. Bosshard, W. Hoetzenecker and P. Schmid-Grendelmeier, 2015 The  
977 Role of *Malassezia* spp. in atopic dermatitis. *Journal of Clinical Medicine* 4:  
978 1217-1228.
- 979 Healy, A. M., S. Zolnierowicz, A. E. Stapleton, M. Goebel, A. A. Depaoli-Roach *et al.*,  
980 1991 *CDC55*, a *Saccharomyces cerevisiae* gene involved in cellular  
981 morphogenesis: identification, characterization, and homology to the B  
982 subunit of mammalian type 2A protein phosphatase. *Molecular and Cellular*  
983 *Biology* 11: 5767-5780.
- 984 Hoffman, C. S., 2001 Preparation of Yeast DNA in *Current Protocols in Molecular*  
985 *Biology*. John Wiley & Sons, Inc.
- 986 Hooykaas, P. J. J., G. P. H. van Heusden, X. Niu, M. Reza Roushan, J. Soltani *et al.*, 2018  
987 *Agrobacterium*-mediated transformation of yeast and fungi, pp. 349-374 in  
988 *Agrobacterium Biology: From Basic Science to Biotechnology*, edited by S. B.  
989 Gelvin. Springer International Publishing, Cham.
- 990 Ianiri, G., S. Appen Clancey, S. C. Lee and J. Heitman, 2017 FKBP12-dependent  
991 inhibition of calcineurin mediates immunosuppressive antifungal drug action  
992 in *Malassezia*. *mBio* 8: e01752-01717.
- 993 Ianiri, G., A. F. Averette, J. M. Kingsbury, J. Heitman and A. Idnurm, 2016 Gene  
994 function analysis in the ubiquitous human commensal and pathogen  
995 *Malassezia* genus. *mBio* 7: e01853-01816.
- 996 Ianiri, G., J. Heitman and A. Scheynius, 2018 The skin commensal yeast *Malassezia*  
997 *globosa* thwarts bacterial biofilms to benefit the host. *J Invest Dermatol* 138:  
998 1026-1029.
- 999 Ianiri, G., and A. Idnurm, 2015 Essential gene discovery in the basidiomycete  
1000 *Cryptococcus neoformans* for antifungal drug target prioritization. *mBio* 6:  
1001 e02334-02314.

- 1002 Idnurm, A., A. M. Bailey, T. C. Cairns, C. E. Elliott, G. D. Foster *et al.*, 2017a A silver  
1003 bullet in a golden age of functional genomics: the impact of *Agrobacterium*-  
1004 mediated transformation of fungi. *Fungal Biology and Biotechnology* 4: 6.
- 1005 Idnurm, A., J. L. Reedy, J. C. Nussbaum and J. Heitman, 2004 *Cryptococcus neoformans*  
1006 virulence gene discovery through insertional mutagenesis. *Eukaryotic Cell* 3:  
1007 420-429.
- 1008 Idnurm, A., A. S. Urquhart, D. R. Vummadi, S. Chang, A. P. Van de Wouw *et al.*, 2017b  
1009 Spontaneous and CRISPR/Cas9-induced mutation of the osmosensor  
1010 histidine kinase of the canola pathogen *Leptosphaeria maculans*. *Fungal*  
1011 *Biology and Biotechnology* 4: 12.
- 1012 Ishibashi, Y., T. Sugita and A. Nishikawa, 2006 Cytokine secretion profile of human  
1013 keratinocytes exposed to *Malassezia* yeasts. *FEMS Immunology & Medical*  
1014 *Microbiology* 48: 400-409.
- 1015 Jauniaux, J.-C., L. A. Urrestarazu and J.-M. Wiame, 1978 Arginine metabolism in  
1016 *Saccharomyces cerevisiae*: subcellular localization of the enzymes. *Journal of*  
1017 *bacteriology* 133: 1096-1107.
- 1018 Jinek, M., K. Chylinski, I. Fonfara, M. Hauer, J. A. Doudna *et al.*, 2012 A programmable  
1019 dual-RNA-guided DNA endonuclease in adaptive bacterial immunity. *Science*  
1020 337: 816-821.
- 1021 Kapitzky, L., P. Beltrao, T. J. Berens, N. Gassner, C. Zhou *et al.*, 2010 Cross - species  
1022 chemogenomic profiling reveals evolutionarily conserved drug mode of  
1023 action. *Molecular Systems Biology* 6: 451.
- 1024 Kim, M., Y. J. Cho, M. Park, Y. Choi, S. Y. Hwang *et al.*, 2018 Genomic tandem  
1025 quadruplication is associated with ketoconazole resistance in *Malassezia*  
1026 *pachydermatis*. *J Microbiol Biotechnol* 28: 1937-1945.
- 1027 Kobayashi, Y., H. Iwata, D. Mizushima, J. Ogihara and T. Kasumi, 2015 Erythritol  
1028 production by *Moniliella megachiliensis* using nonrefined glycerol waste as  
1029 carbon source. *Lett Appl Microbiol* 60: 475-480.
- 1030 Kujoth, G. C., T. D. Sullivan, R. Merkhofer, T.-J. Lee, H. Wang *et al.*, 2018 CRISPR/Cas9-  
1031 mediated gene disruption reveals the importance of zinc metabolism for  
1032 fitness of the dimorphic fungal pathogen *Blastomyces dermatitidis*. *mBio* 9:  
1033 e00412-00418.
- 1034 Kumar, S., G. Stecher and K. Tamura, 2016 MEGA7: Molecular evolutionary genetics  
1035 analysis version 7.0 for bigger aatasets. *Mol Biol Evol* 33: 1870-1874.
- 1036 Lees, N., B. Skaggs, D. Kirsch and M. Bard, 1995 Cloning of the late genes in the  
1037 ergosterol biosynthetic pathway of *Saccharomyces cerevisiae*—A review.  
1038 *Lipids* 30: 221-226.
- 1039 Li, H., B. Goh, W. K. Teh, Z. Jiang, J. P. Z. Goh *et al.*, 2017 Skin commensal *Malassezia*  
1040 *globosa* secreted protease attenuates *Staphylococcus aureus* biofilm  
1041 formation. *J Invest Dermatol* 138:1137-1145.
- 1042 Limon, J. J., J. Tang, D. Li, A. J. Wolf, K. S. Michelsen *et al.*, 2019 *Malassezia* is  
1043 associated with Crohn's disease and exacerbates colitis in mouse models. *Cell*  
1044 *Host & Microbe* 25: 377-388.e376.
- 1045 Lorch, J. M., J. M. Palmer, K. J. Vanderwolf, K. Z. Schmidt, M. L. Verant *et al.*, 2018  
1046 *Malassezia vespertilionis* sp. nov.: a new cold-tolerant species of yeast



- 1047 isolated from bats. *Persoonia - Molecular Phylogeny and Evolution of Fungi*  
1048 41: 56-70.
- 1049 Ma, L., Z. Chen, W. Huang da, G. Kutty, M. Ishihara *et al.*, 2016 Genome analysis of  
1050 three *Pneumocystis* species reveals adaptation mechanisms to life exclusively  
1051 in mammalian hosts. *Nat Commun* 7: 10740.
- 1052 Mannhaupt, G., R. Stucka, U. Pilz, C. Schwarzlose and H. Feldmann, 1989  
1053 Characterization of the prephenate dehydrogenase-encoding gene, *TYR1*,  
1054 from *Saccharomyces cerevisiae*. *Gene* 85: 303-311.
- 1055 McKenzie, R. A., M. D. Connole, M. R. McGinnis and R. Lepelaar, 1984 Subcutaneous  
1056 phaeohyphomycosis caused by *Moniliella suaveolens* in two cats. *Veterinary*  
1057 *Pathology* 21: 582-586.
- 1058 Menon, B. B., N. J. Sarma, S. Pasula, S. J. Deminoff, K. A. Willis *et al.*, 2005 Reverse  
1059 recruitment: the Nup84 nuclear pore subcomplex mediates Rap1/Gcr1/Gcr2  
1060 transcriptional activation. *Proceedings of the National Academy of Sciences*  
1061 102: 5749-5754.
- 1062 Michielse, C. B., P. J. Hooykaas, C. A. v. a. n. d. e. n. Hondel and A. F. Ram, 2005  
1063 *Agrobacterium*-mediated transformation as a tool for functional genomics in  
1064 fungi. *Curr Genet* 48:1-17.
- 1065 Min, K., Y. Ichikawa, C. A. Woolford and A. P. Mitchell, 2016 *Candida albicans* gene  
1066 deletion with a transient CRISPR-Cas9 system. *mSphere* 1: e00130-00116.
- 1067 Morand, S. C., M. Bertignac, A. Iltis, I. C. R. M. Kolder, W. Pirovano *et al.*, 2019  
1068 Complete genome sequence of *Malassezia restricta* CBS7877, an opportunist  
1069 pathogen involved in dandruff and seborrheic dermatitis. *Microbiology*  
1070 *Resource Announcements* 8: e01543-01518.
- 1071 Muñoz-Galván, S., S. Jimeno, R. Rothstein and A. Aguilera, 2013 Histone H3K56  
1072 acetylation, Rad52, and non-DNA repair factors control double-strand break  
1073 repair choice with the sister chromatid. *PLoS Genetics* 9: e1003237.
- 1074 Paiva, S., F. Devaux, S. Barbosa, C. Jacq and M. Casal, 2004 *Ady2p* is essential for the  
1075 acetate permease activity in the yeast *Saccharomyces cerevisiae*. *Yeast* 21:  
1076 201-210.
- 1077 Park, M., Y. J. Cho, Y. W. Lee and W. H. Jung, 2017 Whole genome sequencing analysis  
1078 of the cutaneous pathogenic yeast *Malassezia restricta* and identification of  
1079 the major lipase expressed on the scalp of patients with dandruff. *Mycoses*  
1080 60: 188-197.
- 1081 Paul, S., and W. S. Moye-Rowley, 2014 Multidrug resistance in fungi: regulation of  
1082 transporter-encoding gene expression. *Frontiers in Physiology* 5: 143.
- 1083 Pawar, S., D. Murray, W. Khalife, B. Robinson-Dunn and M. McGinnis, 2002 Human  
1084 infection caused by *Moniliella suaveolens*. *Clinical Microbiology Newsletter*  
1085 24: 53-55.
- 1086 Pitkin, J. W., D. G. Panaccione and J. D. Walton, 1996 A putative cyclic peptide efflux  
1087 pump encoded by the *TOXA* gene of the plant-pathogenic fungus *Cochliobolus*  
1088 *carbonum*. *Microbiology* 142: 1557-1565.
- 1089 Rabitsch, K. P., A. Tóth, M. Gálová, A. Schleiffer, G. Schaffner *et al.*, 2001 A screen for  
1090 genes required for meiosis and spore formation based on whole-genome  
1091 expression. *Current Biology* 11: 1001-1009.

- 1092 Rio, D. C., M. Ares, G. J. Hannon and T. W. Nilsen, 2010 Purification of RNA using  
1093 TRIZol (TRI reagent). Cold Spring Harbor Protocols 2010: pdb. prot5439.
- 1094 Sanz, P., K. Ludin and M. Carlson, 2000 Sip5 interacts with both the Reg1/Glc7  
1095 protein phosphatase and the Snf1 protein kinase of *Saccharomyces cerevisiae*.  
1096 Genetics 154: 99-107.
- 1097 Shi, T.-Q., G.-N. Liu, R.-Y. Ji, K. Shi, P. Song *et al.*, 2017 CRISPR/Cas9-based genome  
1098 editing of the filamentous fungi: the state of the art. Applied Microbiology  
1099 and Biotechnology 101: 7435-7443.
- 1100 Sipos, G., and K. Kuchler, 2006 Fungal ATP-binding cassette (ABC) transporters in  
1101 drug resistance & detoxification. Curr Drug Targets 7: 471-481.
- 1102 Sparber, F., C. De Gregorio, S. Steckholzer, F. M. Ferreira, T. Dolowschiak *et al.*, 2019  
1103 The skin commensal yeast *Malassezia* triggers a type 17 response that  
1104 coordinates anti-fungal immunity and exacerbates skin inflammation. Cell  
1105 Host & Microbe 25: 389-403.e386.
- 1106 Sparber, F., and S. LeibundGut-Landmann, 2017 Host Responses to *Malassezia* spp.  
1107 in the Mammalian Skin. Frontiers in Immunology 8: 1614.
- 1108 Triana, S., A. González, R. A. Ohm, H. A. B. Wösten, H. de Cock *et al.*, 2015 Draft  
1109 genome sequence of the animal and human pathogen *Malassezia*  
1110 *pachydermatis* strain CBS 1879. Genome Announcements 3: e01197-01115.
- 1111 Walter, J., J. Urban, C. Volkwein and T. Sommer, 2001 Sec61p-independent  
1112 degradation of the tail-anchored ER membrane protein Ubc6p. EMBO J 20:  
1113 3124-3131.
- 1114 Wang, Q. M., D. Begerow, M. Groenewald, X. Z. Liu, B. Theelen *et al.*, 2015 Multigene  
1115 phylogeny and taxonomic revision of yeasts and related fungi in the  
1116 Ustilaginomycotina. Studies in Mycology 81: 55-83.
- 1117 Wang, Q. M., B. Theelen, M. Groenewald, F. Y. Bai and T. Boekhout, 2014  
1118 Moniliellomycetes and Malasseziomycetes, two new classes in  
1119 Ustilaginomycotina. Persoonia 33: 41-47.
- 1120 Wang, Y., and D. J. Burke, 1997 Cdc55p, the B-type regulatory subunit of protein  
1121 phosphatase 2A, has multiple functions in mitosis and is required for the  
1122 kinetochore/spindle checkpoint in *Saccharomyces cerevisiae*. Mol Cell Biol  
1123 17: 620-626.
- 1124 Wang, Y., D. Wei, X. Zhu, J. Pan, P. Zhang *et al.*, 2016 A 'suicide' CRISPR-Cas9 system  
1125 to promote gene deletion and restoration by electroporation in *Cryptococcus*  
1126 *neoformans*. Scientific Reports 6: 31145.
- 1127 Watanabe, S., R. Kano, H. Sato, Y. Nakamura and A. Hasegawa, 2001 The effects of  
1128 *Malassezia* yeasts on cytokine production by human keratinocytes. Journal of  
1129 Investigative Dermatology 116: 769-773.
- 1130 Wrighton, K. H., 2019 *Malassezia restricta* plays CARDs in the gut. Nature Reviews  
1131 Microbiology 17:266-267.
- 1132 Wu, G., H. Zhao, C. Li, M. P. Rajapakse, W. C. Wong *et al.*, 2015 Genus-wide  
1133 comparative genomics of *Malassezia* delineates its phylogeny, physiology,  
1134 and niche adaptation on human skin. PLoS Genetics 11: e1005614.
- 1135 Xu, J., C. W. Saunders, P. Hu, R. A. Grant, T. Boekhout *et al.*, 2007 Dandruff-associated  
1136 *Malassezia* genomes reveal convergent and divergent virulence traits shared



1137 with plant and human fungal pathogens. Proceedings of the National  
1138 Academy of Sciences 104: 18730-18735.  
1139 Zheng, X., P. Zheng, K. Zhang, T. C. Cairns, V. Meyer *et al.*, 2018 5S rRNA promoter for  
1140 guide RNA expression enabled highly efficient CRISPR/Cas9 genome editing  
1141 in *Aspergillus niger*. ACS Synth Biol.  
1142 Zhu, Y., P. G. Engstrom, C. Tellgren-Roth, C. D. Baudo, J. C. Kennell *et al.*, 2017  
1143 Proteogenomics produces comprehensive and highly accurate protein-  
1144 coding gene annotation in a complete genome assembly of *Malassezia*  
1145 *sympodialis*. Nucleic Acids Res 45: 2629-2643.  
1146

1147

1148

1149

1150

1151

1152

1153

1154

1155

1156

1157

1158

1159

1160

1161

1162

1163

#### 1164 **Figure legends**

1165 **Figure 1** Southern blot analysis of *M. furfur* insertional mutants selected in the  
1166 insertional genetic screen as having a phenotype different than the WT. Genomic DNA  
1167 was digested with SacII, which does not cut within the *NAT* or *NEO* cassette, and  
1168 hybridized with the ORF of the *NEO* (left) and *NAT* (right) genes. Each hybridization  
1169 band corresponds to a single T-DNA insertion. The names of the transformants and of the  
1170 *M. furfur* WT are indicated.

1171

1172 **Figure 2** T-DNA insertion sites in 15 transformants of *M. furfur* as determined by iPCR.

1173 For each transformant, the mutated region and its corresponding region in the WT are  
1174 shown. The region altered by the T-DNA is indicated above the sequence. When 2  
1175 regions are shown above the sequence, it indicates that the T-DNA insertion involved  
1176 different locations of the *M. furfur* genome. The borders of the T-DNA are depicted in  
1177 bold. Uppercase letters represent nucleotides corresponding to regions with RNAseq  
1178 coverage (and hence representing either 5' or 3' UTRs as indicated or ORFs), while  
1179 lowercase letters represent intergenic regions with no RNAseq coverage. The red  
1180 nucleotides in strain 6A10 indicate a TAG stop codon. The symbol ‘-/-’ indicates  
1181 chromosomal rearrangement, with genomic locations shown in parentheses for the 2  
1182 transformants (2H11 and 5F10) having rearrangements involving the same chromosome.

1183

1184 **Figure 3** Position of T-DNA insertions in *M. furfur* mutants and their associated  
1185 phenotypes. Each section shows mutants sensitive to the same stress or condition, such as  
1186 reduced growth on minimal medium YNB (A), reduced growth at 37°C (B), and  
1187 sensitivity to UV light (C), FLC (D), or cadmium sulfate (E). The positions of the T-  
1188 DNA insertions are indicated by red bars, and in the same panel the phenotypes of the  
1189 mutants are also shown. Exons are represented in blue, introns are in white, and UTRs are  
1190 in gray. In the qPCR of panel 3B \*\*\*\*\* indicates  $p < 0.0001$  and \*\*\* indicates  $p < 0.001$   
1191 ( $p = 0.0008$ ) for each pairwise comparison.

1192

1193 **Figure 4** Development of a CRISPR/Cas9 system in *M. furfur*. (A) Complete T-DNA  
1194 necessary for *CAS9* expression and gRNA excision in *M. furfur*. The promoter and  
1195 terminator of the histone *H3* gene of *M. sympodialis* ATCC42132 (*pH3* and *tH3*,  
1196 respectively) and the *CAS9* gene are shown in green. The gRNA is shown in red, and the  
1197 gene-specific target region is shown in yellow. Sites for recombination (rec) are shown in  
1198 blue, and the right and left borders (RB and LB, respectively) of the T-DNA are shown in  
1199 purple. Restriction sites were added to facilitate further molecular manipulation. The  
1200 black bar indicates the full-length gRNA that is shown in greater resolution in B. (B) The  
1201 gRNA includes the 5S rRNA promoter region (*p5S rRNA*) obtained with primers

1202 JOHE46463 and JOHE46464 through touchdown PCR with *M. sympodialis* ATCC42132  
1203 genomic DNA. The gene-specific gRNA was obtained by PCR using a target-specific  
1204 primer, which overlaps with the p5S rRNA and the gRNA scaffold and includes a 20 nt  
1205 target sequence in between them (represented in yellow). This was used in combination  
1206 with JOHE46466, which includes the 6T terminator (and also a region for recombination  
1207 in pPZP201BK, which is not shown). A SpeI restriction site was added to facilitate  
1208 further use of the CRISPR/Cas9 system in *Malassezia*. To perform targeted mutagenesis  
1209 of another gene, we recommend using SpeI digestion of the plasmid in A (pGI40) and  
1210 cloning the 2 PCR products (p5S rRNA and gene-specific gRNA) through Gibson or  
1211 HiFi assembly. We used this strategy to generate binary vector pGI48 for CRISPR/Cas9-  
1212 mediated mutagenesis of the *PDR10* gene.

1213

1214 **Figure 5:** CRISPR/Cas9-mediated target mutagenesis of *M. furfur CDC55*. (A) Co-  
1215 transformation of *M. furfur* mediated by 2 *A. tumefaciens* strains, one that delivers a T-  
1216 DNA including the HDR template (ie *cdc55Δ::NAT* deletion construct in red) and  
1217 another that includes the *CAS9* cassette (in green) and the gene-specific gRNA (dark red).  
1218 Also depicted are the *vir* plasmids present in *A. tumefaciens* cells that are necessary for T-  
1219 DNA excision and transfer to the *M. furfur* nucleus where homologous recombination  
1220 occurs. (B) Magnification of the homologous recombination event that occurs in the *M.*  
1221 *furfur* nucleus. The top construct represents the T-DNA of the plasmid pGI41 bearing the  
1222 *cdc55Δ::NAT* HDR template. The middle panel represents the native *M. furfur CDC55*  
1223 locus, the primers used to amplify the 5' and 3' regions for HR, the internal primer for the  
1224 *CDC55* gene, and the 20-nt target sequence (yellow). The gRNA guides Cas9 to the  
1225 target site to generate a DBS that is repaired using the deletion allele as template,  
1226 resulting in the targeted replacement of *CDC55* with a *NAT* dominant marker (lower  
1227 panel). Primers outside the region in which homologous recombination events occur are  
1228 used in combination with primers for the *NAT* marker to identify *cdc55Δ* mutants. (C)  
1229 Diagnostic PCR analyses of *M. furfur* WT and *NAT*-resistant transformants for the  
1230 identification of *cdc55Δ* mutants. Each panel used the indicated combination of primers,  
1231 whose position can be found in panel B. PCR primers for *CAS9* and gRNA are reported  
1232 in Table S1. (D) Phenotypic analysis of *M. furfur* WT, insertional mutant 1A7, and two

1233 independent *cdc55*Δ mutants on mDixon (control), UV (300 μJ x 100), hydroxyurea (50  
1234 mM) and benomyl (50 μM); 1.5 μL of tenfold serial dilution were spotted on the agar  
1235 plates, incubated at 30°C for 3 to 7 days, and then photographed. (E) Microscopic  
1236 analysis of cell morphology of WT and a representative *cdc55*Δ mutant after growth on  
1237 mDixon and mDixon supplemented with hydroxyurea (50 mM); the black bar indicates 5  
1238 μm.

1239

1240 **Figure 6** Targeted CRISPR/Cas9-mediated gene replacement of the *M. furfur* *PDR10*  
1241 gene. (A) The T-DNA including the *pdr10*Δ::*NAT* HDR template is shown in the top  
1242 panel; The *PDR10* gene, the primers used to amplify the 5' and 3' regions for homologous  
1243 recombination, the internal primer for the *PDR10* gene, and the 20-nt target sequence  
1244 (yellow) for the DBS are shown in the middle panel. The bottom panel shows the *pdr10*Δ  
1245 mutant allele and the primers used for PCR. (B) Diagnostic PCR analyses of *M. furfur*  
1246 WT and 5 FLC sensitive and 1 FLC-resistant transformants for the identification of  
1247 *pdr10*Δ mutants. Each panel used a combination of primers that are represented in panel  
1248 A. (C) 1.5 μl of cellular suspension of the WT strain CBS 14141, insertional mutant 7D9,  
1249 and 2 independent *pdr10*Δ mutants were spotted on mDixon (control), FLC (150 μg/mL),  
1250 amphotericin B (AmB, 50 μg/mL), 5-fluorocytosine (5-FC, 1 mg/mL), caspofungin  
1251 (Caspo, 100 μg/mL), cyclosporine A alone or with 10 mM of LiCl (CsA, 100 μg/mL),  
1252 FK506 (100 μg/mL) alone or with 10 mM of LiCl, benomyl (50 μM), UV (300 μJ x  
1253 100), hydroxyurea (50 mM), or dimethyl sulfoxide [DMSO, 800 μL/L (solvent used to  
1254 resuspend benomyl)]. (D) ACT Artemis synteny comparison of a 15-kb region including  
1255 the 3 copies of the *PDR10* gene of *M. sympodialis* (*Ms*) and the 2 copies of the *PDR10*  
1256 gene of *M. furfur* (*Mf*). (E) The predicted proteins of the *S. cerevisiae* (*Sc*) ABC  
1257 transporters Pdr10, Pdr5, Pdr15, Pdr12, Snq2, Pdr18, Aus1, and Pdr11; *M. sympodialis*  
1258 (*Ms*) Pdr10\_1, Pdr10\_2, and Pdr10\_3; and *M. furfur* (*Mf*) Pdr10\_1 and Pdr10\_2 were  
1259 used to generate a maximum likelihood phylogenetic tree with the LG + G method (100  
1260 bootstrap replications).

1261

1262 **Fig. S1** Phenotypic characterization of putative *M. furfur* *cdc55*Δ mutants on mDixon +  
1263 hydroxyurea (50 mM). The *M. furfur* WT strain and 2 transformants that showed  
1264 increased resistance (R) to hydroxyurea are indicated.

| Strains | Phenotype                  | Hit gene                                                                | Position                                         | Comments                                 |
|---------|----------------------------|-------------------------------------------------------------------------|--------------------------------------------------|------------------------------------------|
| 1A7     | UV                         | <i>CDC55</i>                                                            | ORF                                              | Third exon                               |
| 1F12    | CdSO <sub>4</sub>          | NA                                                                      | NA                                               | NA                                       |
| 2A8     | YNB                        | <i>ARG1</i>                                                             | ORF                                              | Exon                                     |
| 2F4     | CdSO <sub>4</sub>          | <i>SEC13-PRP43</i>                                                      | <i>SEC13-5'</i> region<br><i>PRP43-5'</i> region | Intergenic                               |
| 2G9     | FLC                        | NA                                                                      | NA                                               | Tandem insertion                         |
| 2H11    | FLC, NaCl                  | <i>ERG5/PDA1</i>                                                        | <i>ERG5-ORF</i> /<br><i>PDA1-5'</i> region       | Chromosomal rearrangement                |
| 3A1     | CdSO <sub>4</sub>          | <i>JLP2/TCP1</i>                                                        | <i>JLP2-ORF</i> /<br><i>TCP1-5'</i> region       | Chromosomal rearrangement                |
| 4A10    | NaNO <sub>2</sub> ,<br>SDS | Uncharacterized<br>Enoyl-CoA hydratase                                  | ORF                                              | 2 T-DNA insertions                       |
| 4B1     | CdSO <sub>4</sub>          | <i>MAE1</i>                                                             | 3' UTR                                           | 2 T-DNA insertions                       |
| 5D11    | FLC                        | NA                                                                      | NA                                               | Tandem insertion                         |
| 5F1     | 37°C                       | <i>GPD1/INO80</i>                                                       | <i>GPD1-5'</i> region/<br><i>INO80-5'</i> region | Chromosomal rearrangement                |
| 5F10    | NaCl                       | <i>DUG1/RPC10</i>                                                       | <i>DUG1-3'UTR</i> /<br><i>RPC10-5'UTR</i>        | Chromosomal rearrangement                |
| 6A10    | FLC                        | <i>SIP5</i>                                                             | ORF                                              | Altered stop codon                       |
| 6B2     | 37°C                       | Uncharacterized Rho<br>GTPase                                           | ORF                                              | 2 T-DNA insertions                       |
| 6C8     | YNB                        | <i>TYR1</i> –<br>uncharacterized gene                                   | ORF                                              | Non-standard T-DNA<br>insertion          |
| 7D5     | 37°C                       | NA                                                                      | NA                                               | NA                                       |
| 7D9     | FLC                        | <i>PDR10-<br/>UCB6</i>                                                  | <i>PDR10-5'</i> region<br><i>UCB6-3'</i> region  | Intergenic                               |
| 7F8     | FLC                        | <i>ADY2</i>                                                             | 3' UTR                                           | 260 bp after the predicted stop<br>codon |
| 7H6     | 37°C                       | <i>JEN1</i> -<br>Uncharacterized<br>protein with RNA-<br>binding domain | <i>JEN1-5'</i> region<br>unch.-3' region         | Intergenic                               |

Table 1 Insertional mutants for *M. furfur* isolated in the forward genetic screen.

NA: inverse PCR failed to identify T-DNA insertions

Table 2  
Plasmids used in the present study.

| Name       | Background | Relevant features                                  | Purpose                                                                                          | References                  |
|------------|------------|----------------------------------------------------|--------------------------------------------------------------------------------------------------|-----------------------------|
| pAIM2      | pPZP-201BK | p <i>ACT1-NAT-tACT1</i>                            | Random insertional mutagenesis                                                                   | (IANIRI <i>et al.</i> 2016) |
| pAIM6      | pPZP-201BK | p <i>ACT1-NEO-tACT1</i>                            | Random insertional mutagenesis                                                                   | (IANIRI <i>et al.</i> 2016) |
| pPZP-201BK | NA         | KAN-R                                              | Binary vector that replicates in <i>E. coli</i> and <i>A. tumefaciens</i>                        | (COVERT <i>et al.</i> 2001) |
| pGI3       | pPZP-201BK | Sc <i>URA3</i> + 2 $\mu$ ; KAN-R                   | Binary vector that replicates in <i>E. coli</i> , <i>A. tumefaciens</i> and <i>S. cerevisiae</i> | (IANIRI <i>et al.</i> 2017) |
| pGI40      | pPZP-201BK | p <i>H3-CAS9-tH3</i> + p5S rRNA-sgRNA <i>CDC55</i> | Cas9 endonuclease and <i>CDC55</i> target sgRNA                                                  | This study                  |
| pGI41      | pGI3       | <i>cdc55::NAT</i>                                  | HDR template to generate <i>cdc55</i> $\Delta$                                                   | This study                  |
| pGI42      | pGI3       | <i>pdr10::NAT</i>                                  | HDR template to generate <i>pdr10</i> $\Delta$                                                   | This study                  |
| pGI48      | pGI40      | p <i>H3-CAS9-tH3</i> + p5S rRNA-sgRNA <i>PDR10</i> | Cas9 endonuclease and <i>PDR10_1</i> target sgRNA                                                | This study                  |

Covert, S. F., P. Kapoor, M.-H. Lee, A. Briley and C. J. Nairn, 2001 Agrobacterium tumefaciens-mediated transformation of Fusarium circinatum. Mycol. Res. 105: 259-264.

Ianiri, G., A. F. Averette, J. M. Kingsbury, J. Heitman and A. Idnurm, 2016 Gene function analysis in the ubiquitous human commensal and pathogen Malassezia genus. mBio 7: e01853-01816.

Ianiri, G., K. J. Boyce and A. Idnurm, 2017 Isolation of conditional mutations in genes essential for viability of Cryptococcus neoformans. Curr Genet 63: 519-530.

## Reference



### G418-resistant transformants

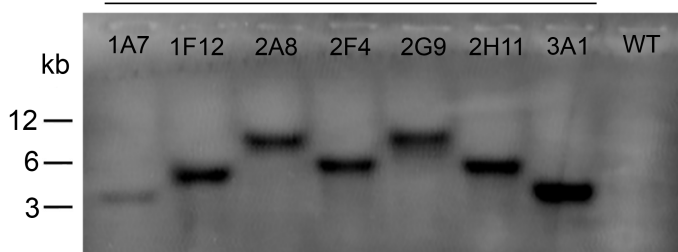

### NAT-resistant transformants

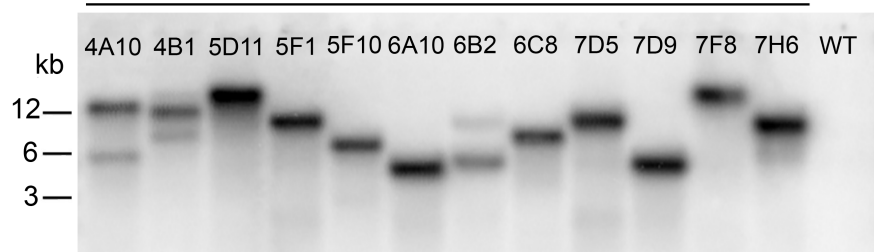

CDC55

WT TCTTTTTGTTGAAGTCGATG-----TGTTTCGGGTTACCCGTACCGAC  
1A7 TCTTTTTGTTGAAGTCGATG**TCA**-T-DNA-**GTTTACACCACAATATATCCTGT**GTGTTTCGGGTTACCCGTACCGAC

ARG1

WT GGAAGATGAGCTCCTCGACGAATTCGCGAC---GCAGATCTTC---GACGATGAACTCCTTCGCACCCGACCCG  
2A8 GGAAGATGAGCTCCTCGACGAATTCGCGAC**AC**-T-DNA-**GTTTACAGACGATGAACTCCTTCGCACCCGACCCG**

5' SEC13

5' PRP43

WT ccatggcggatggcgtagctctgccg-----cgttgc-----cgacgcgccatgtggctccacgtcacg  
2F4 ccatggcggatggcgtagctctgccg**TGTGGTGTAAAC**-T-DNA-**TGA**cgacgcgccatgtggctccacgtcacg

Chr 1 ERG5 (247000)

5' PDA1 (2410000)

WT TCGCAACAAGGAGCCGAAGCCGTTTCATGA / gacgcgctggccttgccatcgcttacgc  
2H11 TCGCAACAAGGAGCCGAAGCCGTTTCATG**TCA**-T-DNA-**GTTTACACC**gacgcgctggccttgccatcgcttacgc

Chr 5 JLP2

Chr 1 5' TCP1

WT GCGCCGCGCACAGACGTAGA / cagcctcgctgtcgctgccgtcggc  
3A1 GCGCCGCGCACAGACGTAG**GGATATATTTGTGGTGTAAAC**-T-DNA-**TG**cagcctcgctgtcgctgccgtcggc

Enoyl-CoA hydratase

WT GGTTCGTGGCGGACATCGGCGG-----GCTCAGGTCCATGTCCGGCAGCC  
4A10 GGTTCGTGGCGGACATCGGCGG**TCA**-T-DNA-**GTTTACACCACAATATATCC**GCTCAGGTCCATGTCCGGCAGCC

3' UTR MAE1

WT GTGACCGACTACATACAGGCGGCAG-----GTAG-----GTAGACTGGAGGTTGCTATGTTGCTTA  
4B1 GTGACCGACTACATACAGGCGGCAG**TCA**-T-DNA-**GTTTACACCACAG**TAGACTGGAGGTTGCTATGTTGCTTA

Chr 3 5' INO80

Chr 1 5' GDP1

WT caggttggtggcgcatgcggttt / cctggcacggattgcgcgccgc  
5F1 caggttggtggcgcatgcggttt**TCA**-T-DNA-**GTTTACACCACAATATAT**cctggcacggattgcgcgccgc

Chr 3 3' DUG1 (144000)

5' UTR RPC10 (260000)

WT gcagctgcgccagagccgcccacttgg / CGTCGGCACCTGACCGCGAAGCC  
5F10 gcagctgcgccagagccgcccacttgg**ATTGTGGTGTAAAC**-T-DNA-**TGA**CGTCGGCACCTGACCGCGAAGCC

SIP5

WT CCGCCGGCGTATGGACGCCGCGGCTCCGT-----AGGCAGGCACGCTGACTCATCCGCGGG  
6A10 CCGCCGGCGTATGGACGCCGCGGCTCCGT**TGGTGTAAAC**-T-DNA-**ACAGGCAGGCACGCTGACTCATCCGCGGG**

Uncharacterized RhoGTPase

WT CGTGGGTAATCAGGCGCACGC-----CGTCGGTG-----CGCCGACGCGCCACACACCCGGT  
6B2 CGTGGGTAATCAGGCGCACGC**AGGATATATTTGTGGTGTAAAC**-T-DNA-**TGAC**GCCGACGCGCCACACACCCGGT

Uncharacterized gene

TYR1

WT TGGTGATAGAACAGGCCGTTTCGGTGTGACG- 760 bp -TGAAGAACAGATCTTATTACTGCGAATACCC  
6C8 **RB**-TGATAGAACAGGCCGTTTCGGTGTGACG-deletion-TGAAGAACAGATCTTATTACTGCGAAT-**LB**

PDR10 5' UTR

3' UBC6

WT tgcaccacaacagaaaaaaaaaacacgc---gcgcgcgcaaca---ttgacaacacattggaccaaccaatgac  
7D9 tgcaccacaacagaaaaaaaaaacacgc**AC**-T-DNA-**GTTTACACCA**ttgacaacacattggaccaaccaatgac

3' UTR ADY2

WT CGCTTTGAGATAACCGAATCTC--GTACTCCGCACTGGCCTCAAACAT--GGTTACGTAAGTCAGATGCGGCTA  
7F8 CGCTTTGAGATAACCGAATCT**TCA**-----T-DNA-----**GTTTACACG**GTTACGTAAGTCAGATGCGGCTA

5' JEN1

3' RNA binding domain

WT gatactagtccaatggggag-----tcttggcgctaaaatcacagcac  
7H6 gatactagtccaatggggag**CA**-T-DNA-**GTTTACACCACAATATATCCTGT**tcttggcgctaaaatcacagcac

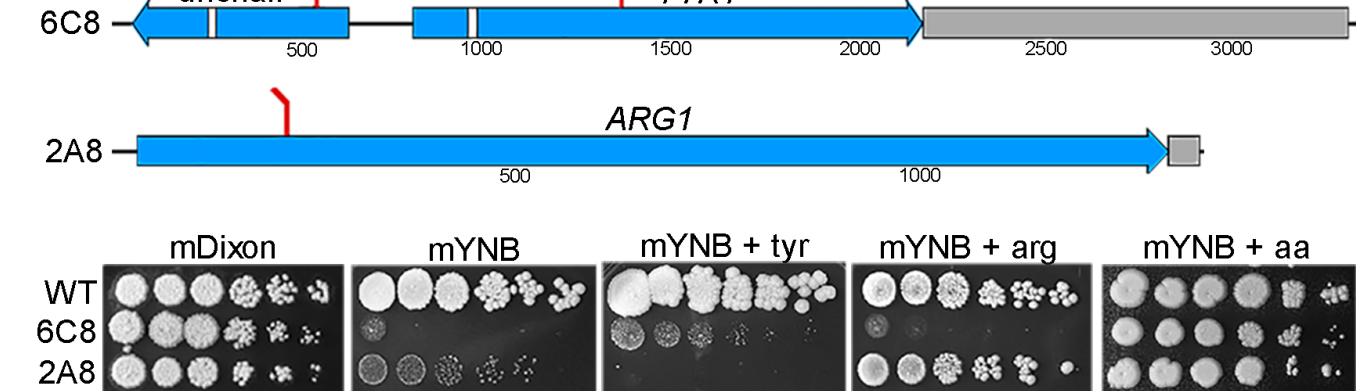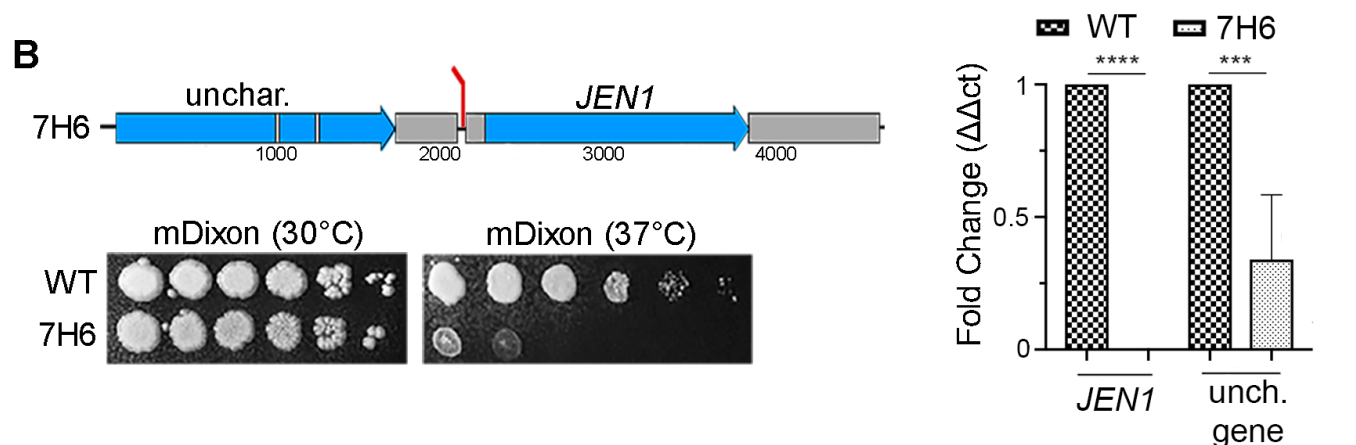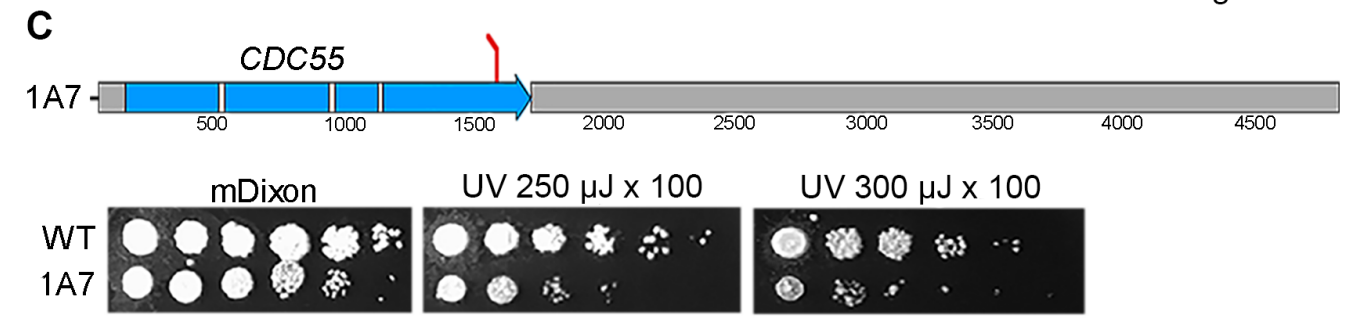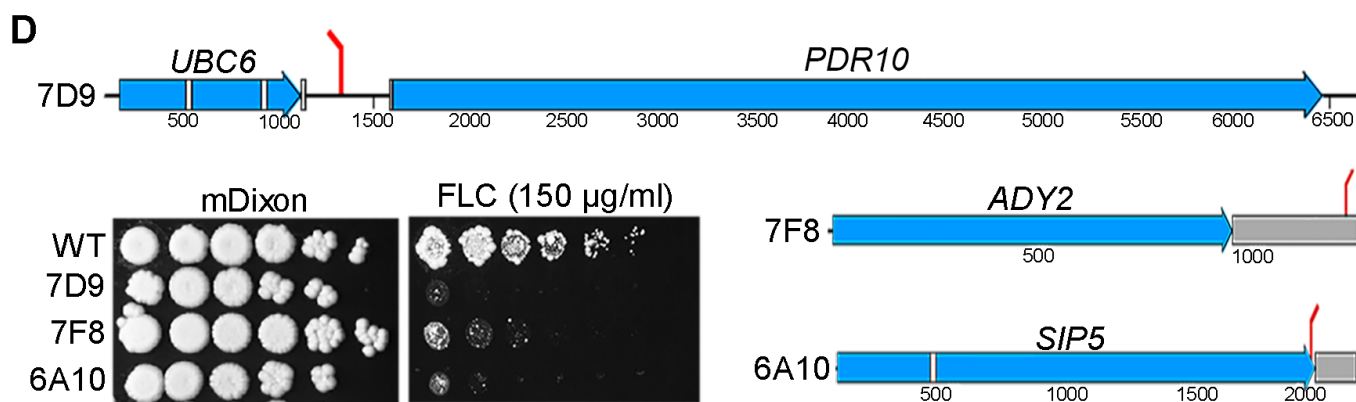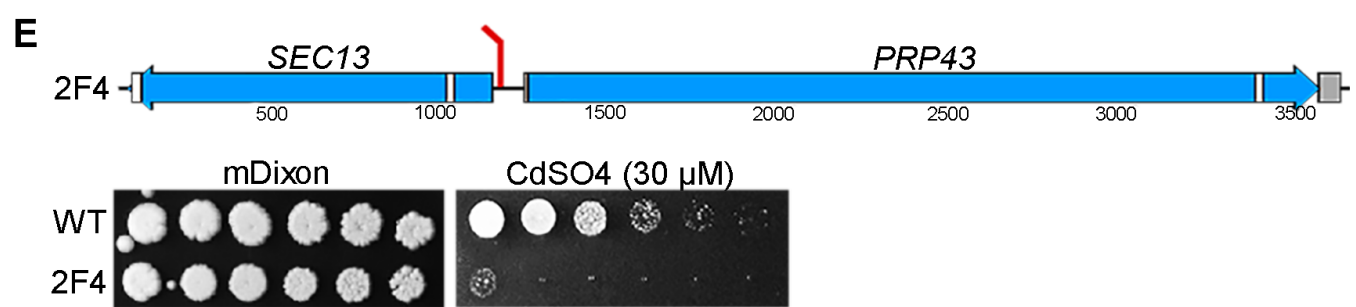

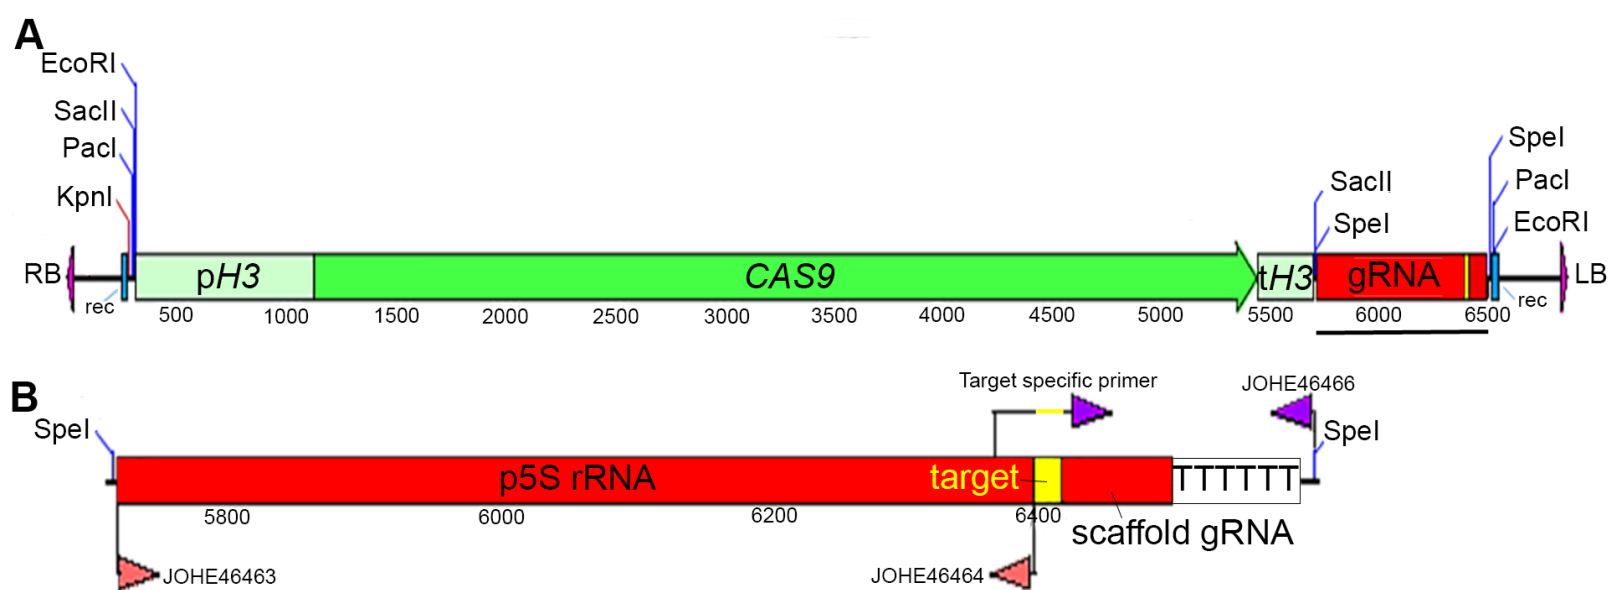

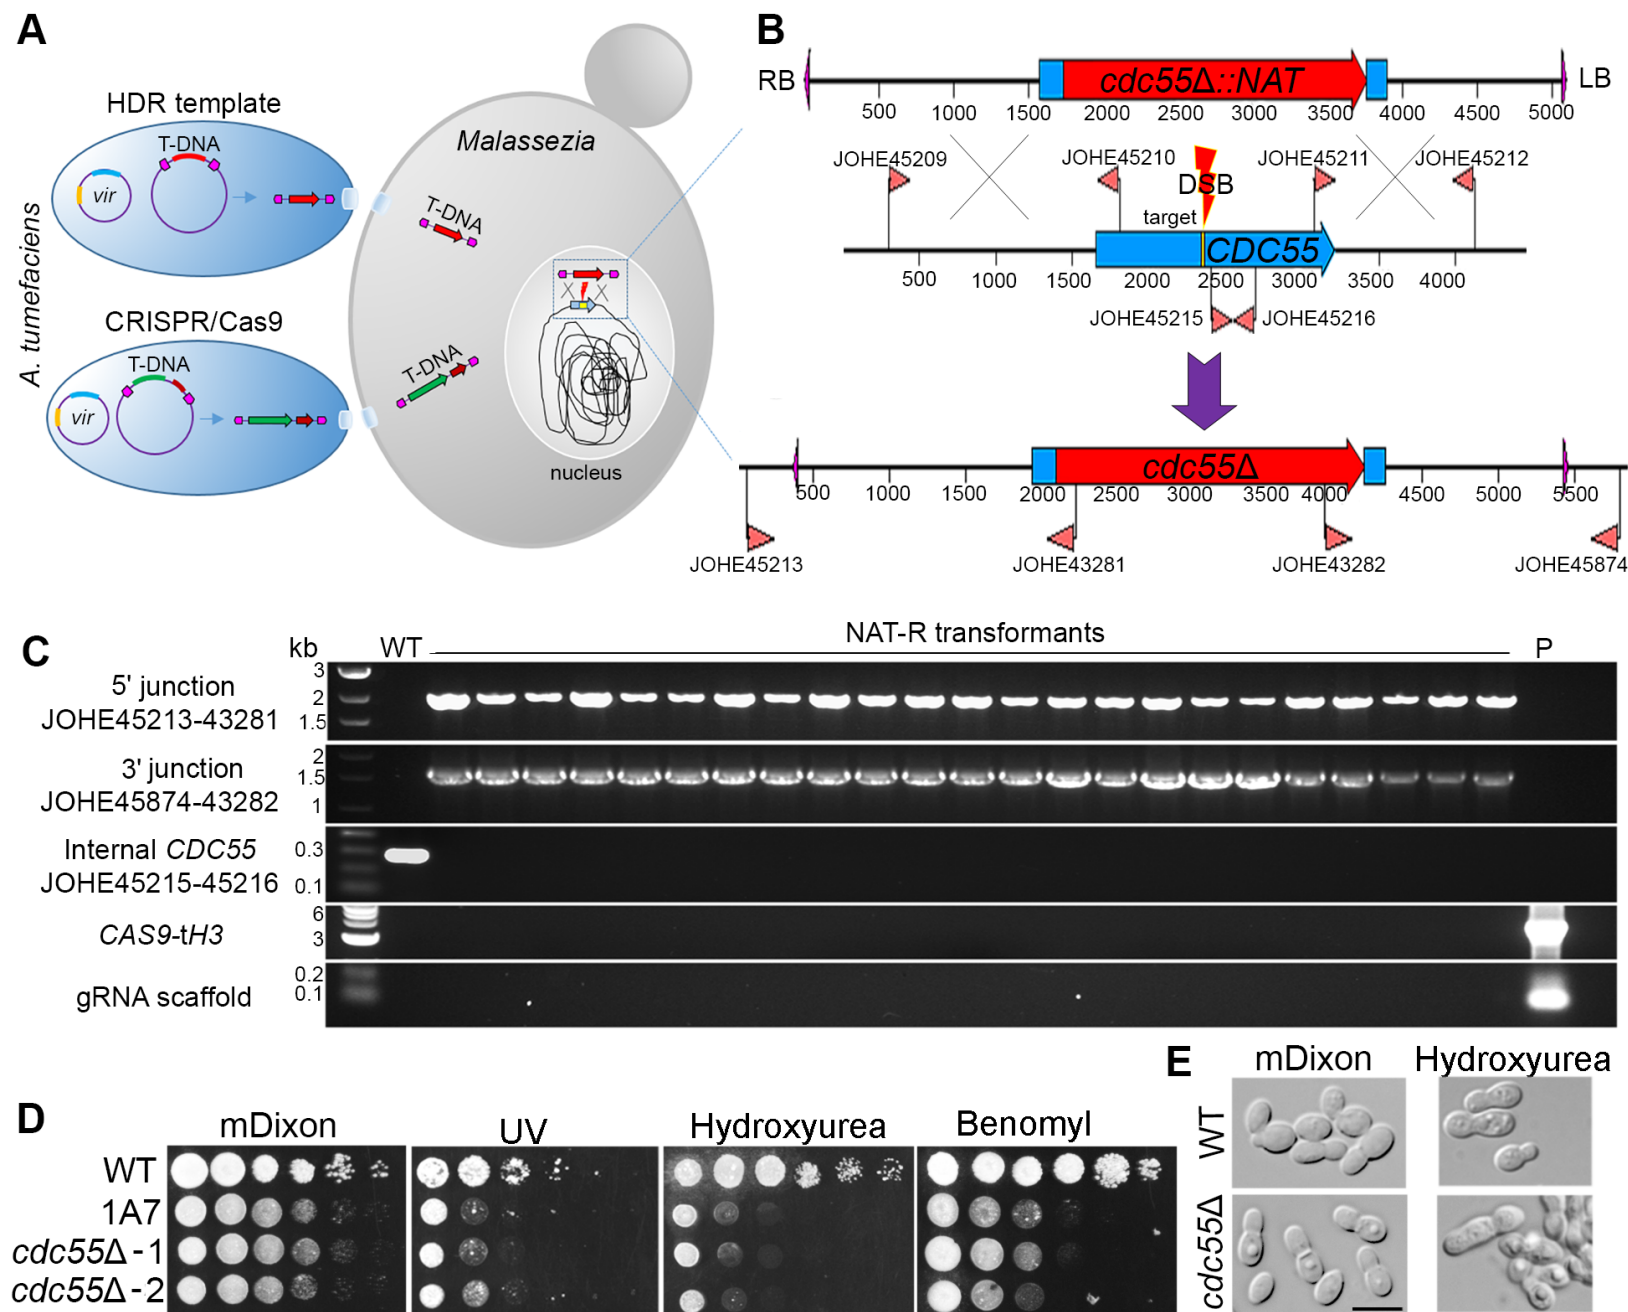



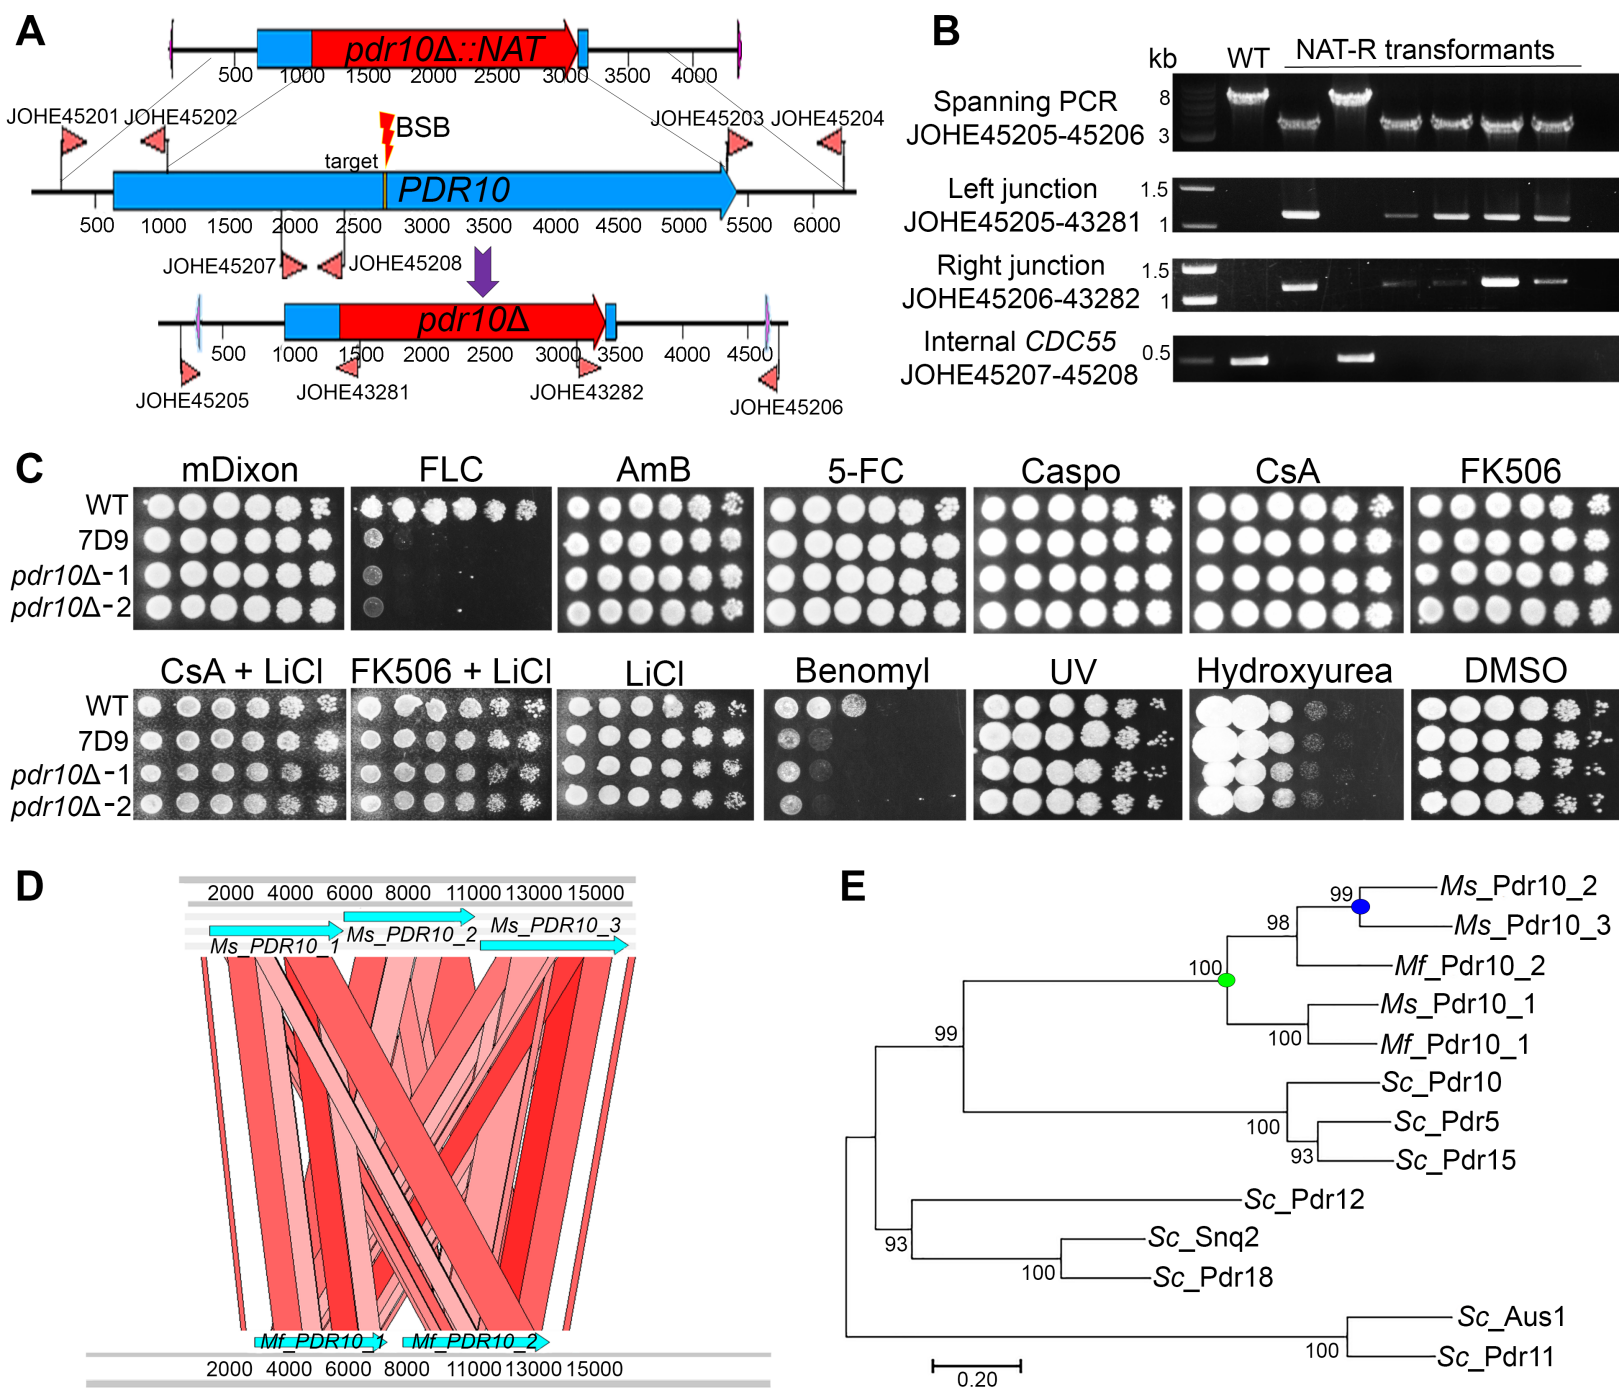

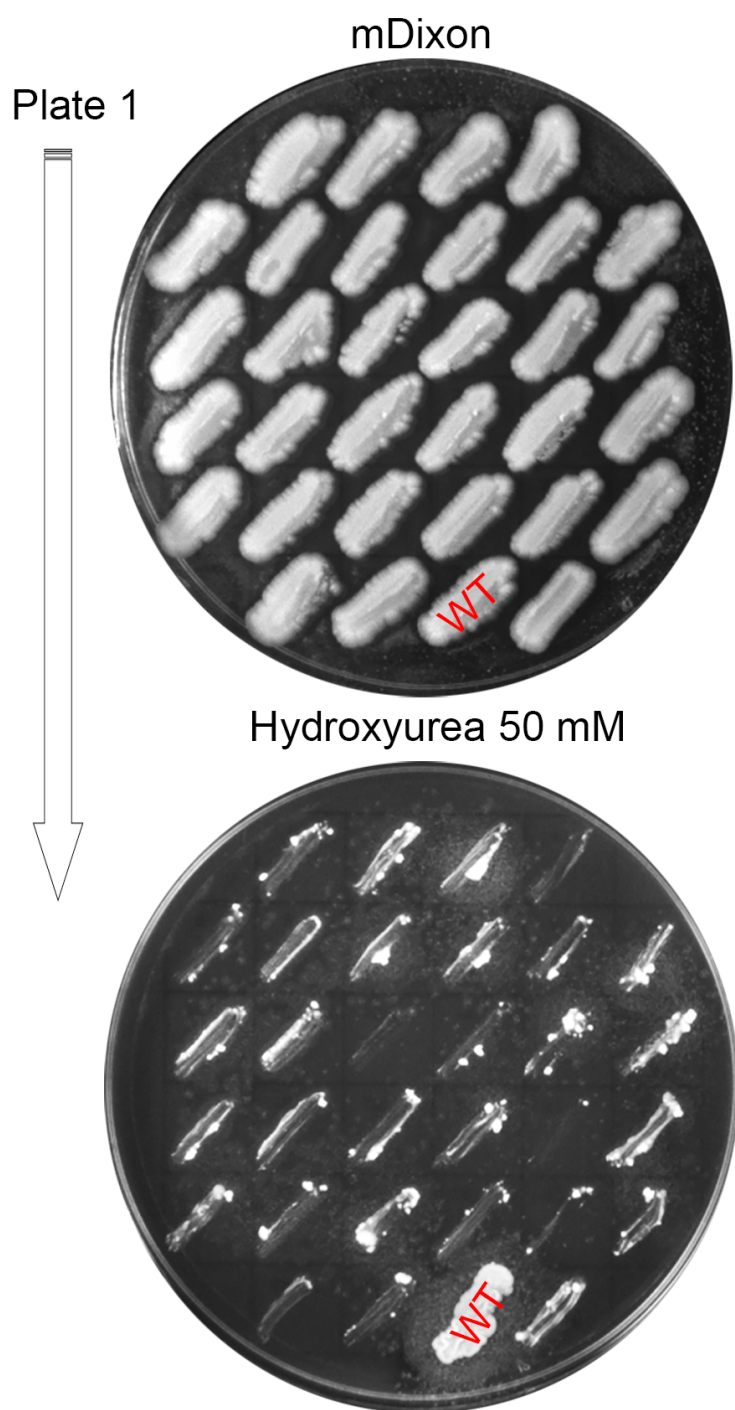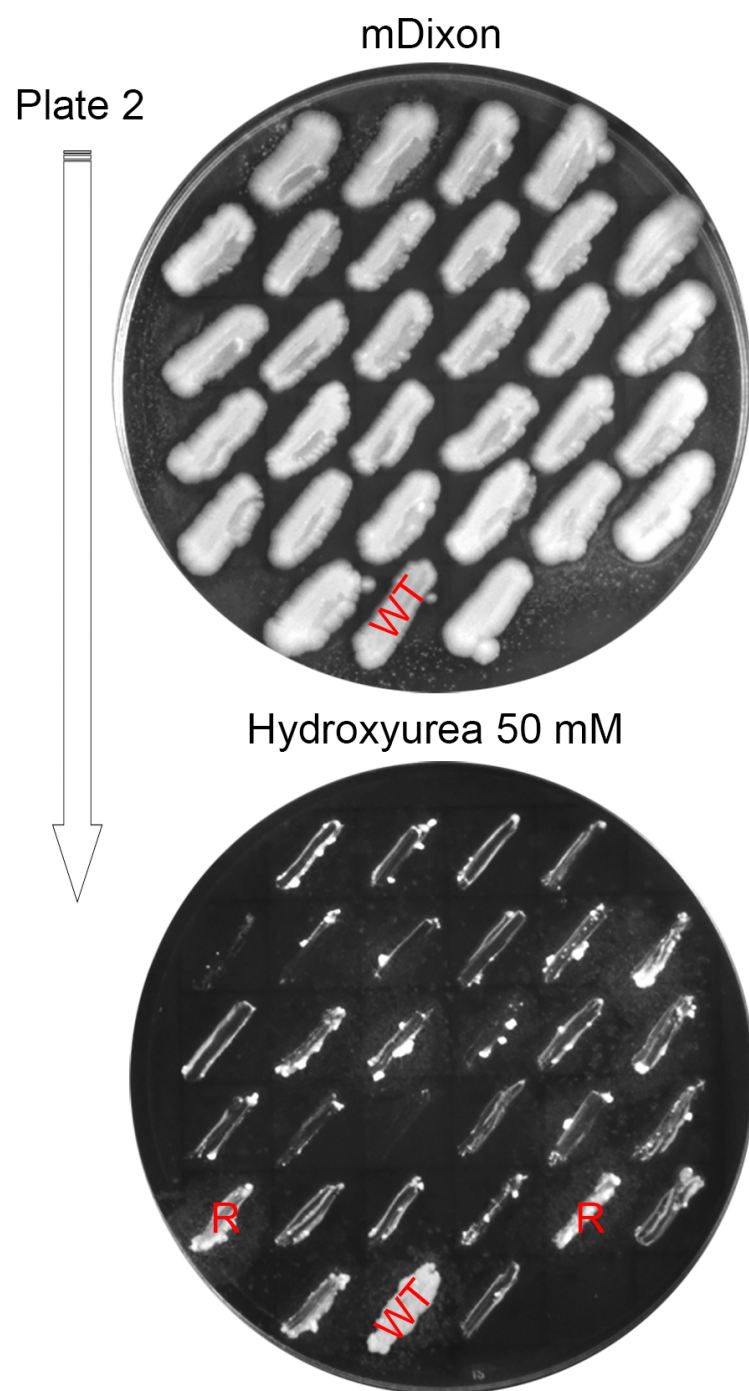

| PRIMERS      | SEQUENCE 5' - 3'                                    | PURPOSE      |
|--------------|-----------------------------------------------------|--------------|
| M13 F        | GTAAAACGACGGCCAGT                                   | NAT and NI   |
| M13 r        | CAGGAAACAGCTATGAC                                   | NAT and NI   |
| JOHE43277    | TCCACGGTGCAGATCCTC                                  | Malassezia   |
| JOHE43278    | CGTCCTCTCCTATGTCTG                                  | Malassezia   |
| ai76         | AACAGTTGCGCAGCCTGAATG                               | inverse PCF  |
| ai77         | AGAGGCGGTTTGCCTATTGG                                | inverse PCF  |
| JOHE43279    | CGTATCCAAGCTCAAGCTC                                 | Forward-ch   |
| JOHE43280    | GTTGGCCGATTCATTAATGC                                | Reverse-ch   |
| JOHE43281    | GTCGGAGAAGCAGTCAATGC                                | Reverse-ch   |
| JOHE43282    | CACCAGGGTTTCCAGTCTC                                 | Forward-ch   |
| JOHE45201    | GCGCGCCTAGGCCTCTGCAGGTCGACTCTggaccagcggaaatttctcc   | PDR10 5'F    |
| JOHE45202    | GAGGATCTGCACCGTGGAgaccaagaaggcaagaagg               | PDR10 5'R    |
| JOHE45203    | CAGACATAGGAGAGGACGccttcattccacgtctgctt              | PDR10 3'F    |
| JOHE45204    | TGATTACGAATTCTTAATTAAGATATCGAGaagtcggtcattggttggtc  | PDR10 3'R    |
| JOHE45205    | cgctggccataaatatcat                                 | PDR10 exte   |
| JOHE45206    | taggtcgctagatcggcagt                                | PDR10 exte   |
| JOHE45207    | acacggaaccgataatcagc                                | PDR10 inte   |
| JOHE45208    | aggtggtggtcctgaacaag                                | PDR10 inte   |
| JOHE45209    | GCGCGCCTAGGCCTCTGCAGGTCGACTCTTTCCCATTCATCTTTCAG     | CDC55 5'F    |
| JOHE45210    | GAGGATCTGCACCGTGGATCACCCGTAGCGAGGTAATC              | CDC55 5'R    |
| JOHE45211    | CAGACATAGGAGAGGACGGAACCCGAACAACATCGACT              | CDC55 3'F    |
| JOHE45212    | TGATTACGAATTCTTAATTAAGATATCGAGTTGTGCAAGTGATCCAGGAG  | CDC55 3'R    |
| JOHE45213    | TCCGCAAAATCCTCAATTTCC                               | CDC55 exte   |
| JOHE45874    | GCGATGAAGAGGTCGAAGAC                                | CDC55 exte   |
| JOHE45215    | ACCTGGGGATCAGTGACAAG                                | CDC55 inte   |
| JOHE45216    | CTCGGAGAAGAACGACTTGG                                | CDC55 inte   |
| JOHE46457    | GCGCGCCTAGGCCTCTGCAGGTCGACTCTGGTACCGAGCTCGA7        | pGI3 recor   |
| JOHE46458    | gctgtatTTTTgtccatTACTCGTAGTAAGAAGCAAC               | pH3_R-Cas'   |
| JOHE46459    | atggacaaaaaacagc                                    | Cas9 F       |
| JOHE46460    | ttaggcgtagtctgggacgtc                               | Cas9 R       |
| JOHE46461    | gacgtcccagactacgcctaaTGGAATCCAAGTGATGTGT            | Cas9-f tH3   |
| JOHE46462    | GGTGGTTTCGACTGTGTGCAACTAGTTTTCCGCGGAAGTCGTCGGGGCTGA | R-tH3-SacII  |
| JOHE46463    | CCGCGGAAAAGTTCGACACAGTCAACACC                       | F- SacII-Spe |
| JOHE46464    | GAAGTGCAGCATCCAGGAT                                 | R-5srRNA     |
| JOHE46465    | GTTTTAGAGCTAGAAATAGCAAGTT                           | Common F     |
| JOHE46466    | TGATTACGAATTCTTAATTAAGATATCGAGACTAGTCCGCTCGAGTAAAC  | Common R     |
| JOHE46467    | ATCCTGGATGCTGCAGTTCGGTGAAGGTCAGGAGCATCGGTTTTAGA     | Furfur_PDR   |
| JOHE46468    | ATCCTGGATGCTGCAGTTCGGTGTGCGGTGAAGTTCGGATGGTTTTAGA   | Furfur_CDC   |
| JOHE44509/GI | CTTACGTCTAACCAGTCGTC                                | qPCR_JEN1    |
| JOHE44510    | CGAACGAGTTTGGCAGAATC                                | qPCR_JEN1    |
| JOHE44511    | CCCTCATGTCTCAACACG                                  | qPCR_unch    |
| JOHE44512    | GGTCTTGGTAGATTCTGAT                                 | qPCR_unch    |
| JOHE44515    | GCCAGCTGAAGTTCGGACCTC                               | qPCR_TUB2    |
| JOHE44516    | GCGAGCCCTTGGCAGTCAG                                 | qPCR_TUB2    |



EO cassette amplification

EO cassette amplification

NAT - F

NAT - R

∫

∫

check correct recombination with pGI3

check correct recombination with pGI3

check correct recombination when using Malassezia NAT gene; screening candidate KO

check correct recombination when using Malassezia NAT gene; screening candidate KO

external screen F

external screen R

1b + MCS pH3\_F

9

-SpeI-5srRNA

!I-5srRNA

gRNA

gRNA + pGI3 recombination

∫12

∫55

∫-F

∫-R

characterize gene

characterize gene

∫-F

∫-R
